# Supplementary material for: Theoretical Study on Ethylene Polymerization Catalyzed by Half-Titanocenes Bearing Different Ancillary Groups
Source: MDPI journal article supplement (doi:10.3390/catal11111392), 2021-11-18
Supplement: s1 [file s1]

## Supporting Information

# Theoretical Study on Ethylene Polymerization Catalyzed by Half-Titanocenes Bearing Different Ancillary Groups

Yang Li <sup>1,2</sup>, Xiaoling Lai <sup>1</sup>, Xiaowei Xu <sup>1</sup>, Yat-Ming So <sup>3</sup>, Yijing Du <sup>1</sup>, Zhengze Zhang <sup>1</sup>, Yu Pan <sup>1,2,\*</sup>

<sup>1</sup> School of Chemical Engineering, Dalian University of Technology, Panjin 124221, China; [chyangli@dlut.edu.cn](mailto:chyangli@dlut.edu.cn) (Y.L.); [1134342355@qq.com](mailto:1134342355@qq.com) (X.L.); [1083486332@qq.com](mailto:1083486332@qq.com) (X.X.); [duyj7879@163.com](mailto:duyj7879@163.com) (Y.D.); [742844732@qq.com](mailto:742844732@qq.com) (Z.Z.)

<sup>2</sup> State Key Laboratory of Fine Chemicals, Dalian University of Technology, Dalian 116024, China

<sup>3</sup> Department of Chemistry, The Hong Kong University of Science and Technology, Clear Water Bay, Kowloon, Hong Kong, China; [chsyzm@connect.ust.hk](mailto:chsyzm@connect.ust.hk) (Y.-M.S.)

\* Correspondence: [ypan@dlut.edu.cn](mailto:ypan@dlut.edu.cn) (Y.P.)

## Contents:

1. **Figure S1.** Some occupied HOMOs of **1B**, **2B** and **3B**. The isosurface of MOs is 0.05. Page S2
2. **Table S1.** Cartesian coordinates for all of the calculated structures. Page S3

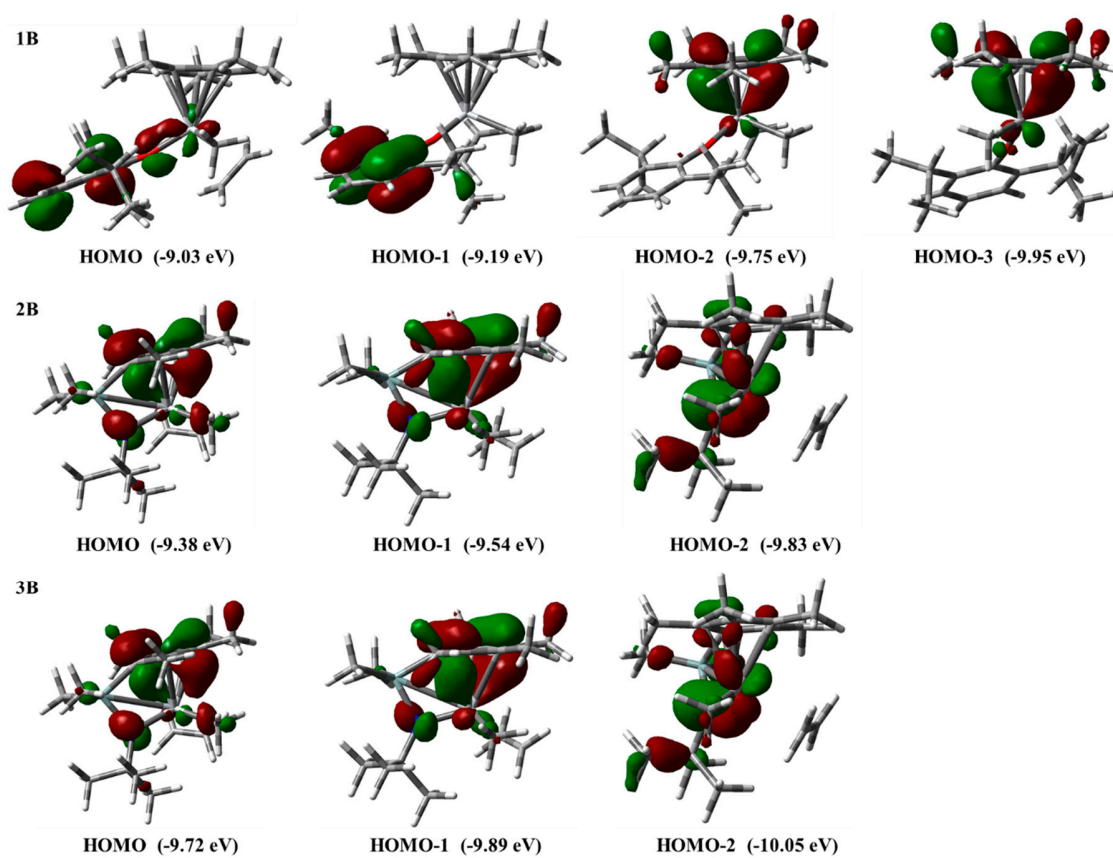

**Figure S1.** Some occupied HOMOs of **1B**, **2B** and **3B**. The isosurface of MOs is 0.05.

**Table S1.** Cartesian coordinates for all of the calculated structures.

|                                   |           |           |           |           |           |           |           |
|-----------------------------------|-----------|-----------|-----------|-----------|-----------|-----------|-----------|
| 6                                 |           |           |           | H         | 5.285602  | -0.542314 | 0.092682  |
| <b>C<sub>2</sub>H<sub>4</sub></b> |           |           |           | H         | 3.229977  | -2.324226 | 2.158695  |
| C                                 | 0.000000  | 0.000000  | 0.665035  | H         | 3.536848  | -3.814623 | 1.248822  |
| H                                 | 0.000000  | 0.923501  | 1.237850  | H         | 4.753021  | -2.536199 | 1.286228  |
| H                                 | 0.000000  | -0.923501 | 1.237850  | H         | 3.528114  | -3.800289 | -1.307832 |
| C                                 | 0.000000  | 0.000000  | -0.665035 | H         | 3.176692  | -2.307601 | -2.197188 |
| H                                 | 0.000000  | -0.923501 | -1.237850 | H         | 4.724111  | -2.500293 | -1.363329 |
| H                                 | 0.000000  | 0.923501  | -1.237850 | H         | 0.650232  | 2.845961  | -2.284504 |
|                                   |           |           |           | H         | -0.039642 | 1.317774  | -1.911796 |
| 60                                |           |           |           | H         | -0.926543 | 2.825861  | -1.491961 |
| <b>1A</b>                         |           |           |           | H         | 1.389530  | 4.022155  | 1.231261  |
| Ti                                | -0.985438 | -0.173460 | -0.501030 | H         | 1.514124  | 4.460761  | -0.481281 |
| O                                 | 0.756698  | -0.340956 | -0.183227 | H         | -0.066643 | 4.399843  | 0.295976  |
| C                                 | -2.736921 | 0.870281  | 0.722331  |           |           |           |           |
| C                                 | -3.400794 | 0.090111  | -0.284170 | 66        |           |           |           |
| C                                 | -3.071133 | -1.276169 | -0.073129 | <b>1B</b> |           |           |           |
| C                                 | -2.171023 | -1.341407 | 1.052560  | Ti        | 1.120308  | 0.130945  | 0.585949  |
| C                                 | -2.002141 | -0.016681 | 1.569215  | O         | -0.653513 | 0.053718  | 0.458696  |
| C                                 | 2.003159  | 0.226563  | -0.082101 | C         | 1.816142  | 1.016650  | -1.448777 |
| C                                 | 2.061667  | 1.638914  | -0.085276 | C         | 2.982652  | 1.086613  | -0.617578 |
| C                                 | 4.379785  | 0.053789  | 0.041259  | C         | 3.367228  | -0.247018 | -0.296483 |
| C                                 | 3.139080  | -0.595789 | -0.015063 | C         | 2.448758  | -1.143180 | -0.944854 |
| C                                 | -2.910439 | 2.350903  | 0.923425  | C         | 1.505045  | -0.362784 | -1.671608 |
| C                                 | -4.332951 | 0.620503  | -1.335899 | C         | -1.978615 | -0.004996 | 0.103328  |
| C                                 | -3.663226 | -2.452011 | -0.789548 | C         | -2.698256 | 1.210616  | 0.006431  |
| C                                 | -1.623221 | -2.604258 | 1.660184  | C         | -3.930866 | -1.277816 | -0.478671 |
| C                                 | 0.763656  | 2.436884  | -0.135208 | C         | -2.576167 | -1.265671 | -0.130704 |
| C                                 | 0.057928  | 2.345719  | -1.511477 | C         | 1.119481  | 2.182366  | -2.090053 |
| C                                 | 0.913480  | 3.915411  | 0.253230  | C         | 3.769817  | 2.324838  | -0.308692 |
| C                                 | 3.038329  | -2.114496 | -0.016364 | C         | 4.629540  | -0.624482 | 0.428114  |
| C                                 | 3.676176  | -2.728909 | 1.244707  | C         | 2.529730  | -2.645361 | -0.968907 |
| C                                 | 3.651951  | -2.712635 | -1.298188 | C         | -2.055092 | 2.551194  | 0.336032  |
| C                                 | 3.324021  | 2.230568  | -0.029514 | C         | -2.306048 | 2.913275  | 1.815826  |
| C                                 | 4.475929  | 1.442259  | 0.031007  | C         | -2.510383 | 3.692936  | -0.589358 |
| C                                 | -1.234548 | 0.350873  | 2.809259  | C         | -1.824779 | -2.577793 | 0.054764  |
| H                                 | 0.095355  | 1.990894  | 0.623977  | C         | -2.028841 | -3.560816 | -1.113505 |
| H                                 | 1.974299  | -2.373443 | -0.007940 | C         | -2.222941 | -3.243116 | 1.390250  |
| C                                 | -1.151499 | -1.206756 | -2.283421 | C         | -4.046558 | 1.128979  | -0.352598 |
| H                                 | -2.076616 | -1.061215 | -2.846827 | C         | -4.660760 | -0.097931 | -0.595195 |
| H                                 | -0.290765 | -0.874611 | -2.879686 | C         | 0.438605  | -0.881003 | -2.593399 |
| H                                 | -1.024733 | -2.279640 | -2.087836 | H         | -0.974382 | 2.441115  | 0.205098  |
| H                                 | -4.600601 | -2.744286 | -0.300896 | H         | -0.753518 | -2.346192 | 0.100714  |
| H                                 | -3.896601 | -2.227908 | -1.832671 | C         | 1.426352  | 1.852265  | 1.712935  |
| H                                 | -3.002987 | -3.321959 | -0.769885 | H         | 2.425291  | 1.884232  | 2.162069  |
| H                                 | -2.355797 | -3.031686 | 2.355642  | H         | 1.276595  | 2.780886  | 1.154423  |
| H                                 | -1.411875 | -3.367010 | 0.905871  | H         | 0.666860  | 1.809025  | 2.504165  |
| H                                 | -0.705023 | -2.422216 | 2.222700  | H         | 5.480940  | -0.568999 | -0.260904 |
| H                                 | -1.861983 | 0.199587  | 3.695787  | H         | 4.848392  | 0.052931  | 1.258358  |
| H                                 | -0.338998 | -0.262674 | 2.934440  | H         | 4.602968  | -1.643947 | 0.818255  |
| H                                 | -0.924538 | 1.398505  | 2.808347  | H         | 2.926685  | -2.982483 | -1.933747 |
| H                                 | -3.817628 | 2.537836  | 1.510881  | H         | 3.197078  | -3.036161 | -0.197840 |
| H                                 | -2.077363 | 2.798070  | 1.470145  | H         | 1.551205  | -3.119525 | -0.844440 |
| H                                 | -3.029180 | 2.888454  | -0.021345 | H         | 0.232845  | -1.938396 | -2.418911 |
| H                                 | -5.359512 | 0.651037  | -0.950531 | H         | -0.502656 | -0.334572 | -2.492772 |
| H                                 | -4.076657 | 1.638376  | -1.641888 | H         | 0.767170  | -0.779687 | -3.634738 |
| H                                 | -4.341820 | -0.009278 | -2.228655 | H         | 1.597193  | 2.418913  | -3.049093 |
| H                                 | 3.419399  | 3.310522  | -0.028210 | H         | 0.068224  | 1.967440  | -2.295058 |
| H                                 | 5.450652  | 1.917574  | 0.074374  | H         | 1.169753  | 3.082736  | -1.473173 |

|   |           |           |           |
|---|-----------|-----------|-----------|
| H | 4.517388  | 2.491037  | -1.093918 |
| H | 3.139771  | 3.215748  | -0.267625 |
| H | 4.306667  | 2.248929  | 0.639895  |
| H | -4.628537 | 2.040064  | -0.439434 |
| H | -5.710287 | -0.134241 | -0.869763 |
| H | -4.424137 | -2.227634 | -0.657821 |
| H | -1.791394 | -3.102121 | -2.077621 |
| H | -1.391077 | -4.441501 | -0.983903 |
| H | -3.061362 | -3.918797 | -1.164038 |
| H | -1.630063 | -4.146944 | 1.569690  |
| H | -2.092974 | -2.563973 | 2.239453  |
| H | -3.277243 | -3.536602 | 1.375508  |
| H | -3.376260 | 3.045437  | 2.005561  |
| H | -1.945133 | 2.128493  | 2.488346  |
| H | -1.799187 | 3.848246  | 2.076646  |
| H | -2.377013 | 3.437824  | -1.645413 |
| H | -3.562915 | 3.950918  | -0.437548 |
| H | -1.928226 | 4.596104  | -0.380931 |
| C | 0.838012  | -1.305139 | 2.743293  |
| H | 0.481756  | -0.476442 | 3.348985  |
| C | 2.143378  | -1.445000 | 2.433967  |
| H | 2.504890  | -2.324997 | 1.912442  |
| H | 2.889472  | -0.739971 | 2.790340  |
| H | 0.103916  | -2.053138 | 2.460959  |

66

**1TS(B-C)**

|    |           |           |           |
|----|-----------|-----------|-----------|
| Ti | -1.076683 | -0.044076 | 0.448213  |
| O  | 0.678261  | -0.009600 | 0.244580  |
| C  | -2.062927 | -1.045433 | -1.387907 |
| C  | -3.133936 | -0.909383 | -0.439657 |
| C  | -3.371342 | 0.480258  | -0.237871 |
| C  | -2.432086 | 1.210467  | -1.031647 |
| C  | -1.635674 | 0.265022  | -1.761821 |
| C  | 2.043554  | 0.017199  | 0.086161  |
| C  | 2.738102  | -1.209252 | -0.003601 |
| C  | 4.085815  | 1.262247  | -0.097192 |
| C  | 2.692816  | 1.270389  | 0.028047  |
| C  | -1.550106 | -2.339084 | -1.959789 |
| C  | -3.956761 | -2.033893 | 0.127977  |
| C  | -4.482312 | 1.070056  | 0.580166  |
| C  | -2.374354 | 2.703907  | -1.181630 |
| C  | 2.033343  | -2.558729 | 0.051990  |
| C  | 2.377753  | -3.317953 | 1.349291  |
| C  | 2.339062  | -3.420650 | -1.188285 |
| C  | 1.937665  | 2.590764  | 0.113399  |
| C  | 2.260056  | 3.522841  | -1.070522 |
| C  | 2.203540  | 3.296631  | 1.458665  |
| C  | 4.130071  | -1.148976 | -0.126047 |
| C  | 4.802141  | 0.069992  | -0.170282 |
| C  | -0.602406 | 0.595985  | -2.802462 |
| H  | 0.953069  | -2.374391 | 0.056266  |
| H  | 0.866457  | 2.368093  | 0.065268  |
| C  | -1.229180 | -1.638918 | 2.367386  |
| H  | -1.940003 | -2.135565 | 3.022161  |
| H  | -1.375334 | -2.063821 | 1.353680  |
| H  | -0.198514 | -1.752408 | 2.692626  |
| H  | -5.379612 | 1.185911  | -0.039963 |
| H  | -4.759501 | 0.433236  | 1.424404  |
| H  | -4.235656 | 2.062355  | 0.965677  |

|   |           |           |           |
|---|-----------|-----------|-----------|
| H | -3.026301 | 3.023545  | -2.003739 |
| H | -2.711268 | 3.222000  | -0.280763 |
| H | -1.365925 | 3.054446  | -1.414664 |
| H | -0.129247 | 1.562567  | -2.615479 |
| H | 0.187486  | -0.156926 | -2.850808 |
| H | -1.071622 | 0.647326  | -3.792253 |
| H | -2.149043 | -2.626907 | -2.832365 |
| H | -0.512263 | -2.258529 | -2.290336 |
| H | -1.612076 | -3.164133 | -1.244473 |
| H | -4.834818 | -2.211392 | -0.504324 |
| H | -3.400986 | -2.974287 | 0.170497  |
| H | -4.324232 | -1.812545 | 1.133584  |
| H | 4.697083  | -2.072697 | -0.187924 |
| H | 5.883220  | 0.090959  | -0.264984 |
| H | 4.618902  | 2.206964  | -0.137927 |
| H | 2.070961  | 3.032738  | -2.031034 |
| H | 1.645993  | 4.428068  | -1.019467 |
| H | 3.307108  | 3.840632  | -1.063126 |
| H | 1.617931  | 4.219015  | 1.534148  |
| H | 1.947102  | 2.654898  | 2.308434  |
| H | 3.260200  | 3.564295  | 1.560130  |
| H | 3.444580  | -3.558424 | 1.393754  |
| H | 2.141263  | -2.724352 | 2.238896  |
| H | 1.823060  | -4.260646 | 1.405489  |
| H | 2.087110  | -2.894920 | -2.114919 |
| H | 3.398703  | -3.688501 | -1.240311 |
| H | 1.767285  | -4.353901 | -1.156146 |
| C | -1.732865 | 0.272352  | 2.872309  |
| H | -2.792202 | 0.120984  | 3.058822  |
| C | -1.392263 | 1.373309  | 1.948100  |
| H | -0.436937 | 1.854747  | 2.159868  |
| H | -2.195391 | 2.089844  | 1.800351  |
| H | -1.131883 | 0.193307  | 3.774943  |

66

**1C**

|    |           |           |           |
|----|-----------|-----------|-----------|
| Ti | 1.120243  | -0.020617 | 0.470141  |
| O  | -0.655695 | -0.054691 | 0.420275  |
| C  | 1.581763  | 0.641600  | -1.714956 |
| C  | 2.670452  | 1.118001  | -0.918396 |
| C  | 3.374382  | -0.015243 | -0.399494 |
| C  | 2.708772  | -1.194370 | -0.847626 |
| C  | 1.589742  | -0.785379 | -1.653795 |
| C  | -1.982002 | 0.039818  | 0.078801  |
| C  | -2.546984 | 1.325420  | -0.079978 |
| C  | -4.070219 | -1.023316 | -0.424205 |
| C  | -2.721930 | -1.153261 | -0.075193 |
| C  | 0.642219  | 1.474083  | -2.541532 |
| C  | 3.058087  | 2.561607  | -0.740849 |
| C  | 4.638498  | 0.018010  | 0.412362  |
| C  | 3.185208  | -2.605619 | -0.664681 |
| C  | -1.735193 | 2.585195  | 0.196453  |
| C  | -1.801611 | 2.946457  | 1.696644  |
| C  | -2.141707 | 3.788816  | -0.669177 |
| C  | -2.092296 | -2.514733 | 0.191897  |
| C  | -2.640832 | -3.634967 | -0.707213 |
| C  | -2.242683 | -2.888797 | 1.682586  |
| C  | -3.900548 | 1.387719  | -0.424575 |
| C  | -4.654684 | 0.228895  | -0.601614 |
| C  | 0.672241  | -1.697942 | -2.418431 |
| H  | -0.686788 | 2.361638  | -0.045080 |

|   |           |           |           |
|---|-----------|-----------|-----------|
| H | -1.020033 | -2.427803 | -0.016529 |
| C | 1.709934  | 1.159147  | 2.598534  |
| H | 2.778195  | 1.221874  | 2.370555  |
| H | 1.139342  | 1.691312  | 1.798346  |
| H | 1.518879  | 1.813145  | 3.452825  |
| H | 5.508491  | -0.124946 | -0.239866 |
| H | 4.779610  | 0.974837  | 0.921673  |
| H | 4.670019  | -0.775859 | 1.164042  |
| H | 3.811396  | -2.899441 | -1.515879 |
| H | 3.790952  | -2.721835 | 0.236679  |
| H | 2.357304  | -3.316493 | -0.608655 |
| H | 0.587001  | -2.680578 | -1.949030 |
| H | -0.332738 | -1.280367 | -2.515940 |
| H | 1.062907  | -1.854308 | -3.431446 |
| H | 0.976127  | 1.484992  | -3.586188 |
| H | -0.377222 | 1.079975  | -2.529260 |
| H | 0.606835  | 2.512053  | -2.203731 |
| H | 3.710420  | 2.878881  | -1.563209 |
| H | 2.190189  | 3.226866  | -0.746907 |
| H | 3.608237  | 2.733229  | 0.187717  |
| H | -4.374727 | 2.354169  | -0.555422 |
| H | -5.703041 | 0.302881  | -0.873128 |
| H | -4.673996 | -1.914302 | -0.557093 |
| H | -2.580352 | -3.371031 | -1.767571 |
| H | -2.066151 | -4.553375 | -0.551472 |
| H | -3.684716 | -3.870578 | -0.478085 |
| H | -1.746878 | -3.842356 | 1.894614  |
| H | -1.810929 | -2.122844 | 2.335115  |
| H | -3.299047 | -2.993109 | 1.950752  |
| H | -2.828330 | 3.191344  | 1.986010  |
| H | -1.474923 | 2.113464  | 2.328322  |
| H | -1.174917 | 3.817884  | 1.917028  |
| H | -2.140424 | 3.540960  | -1.734842 |
| H | -3.138923 | 4.157527  | -0.410512 |
| H | -1.445243 | 4.618109  | -0.509722 |
| C | 1.255877  | -0.294232 | 2.960658  |
| H | 1.811767  | -0.540735 | 3.872053  |
| C | 1.551841  | -1.402234 | 1.910568  |
| H | 0.836562  | -2.224103 | 1.979159  |
| H | 2.570517  | -1.782853 | 1.986570  |
| H | 0.194883  | -0.275149 | 3.222078  |

66  
1D

|    |           |           |           |
|----|-----------|-----------|-----------|
| Ti | 1.091946  | -0.081484 | 0.334872  |
| O  | -0.679590 | -0.084680 | 0.242842  |
| C  | 1.738067  | 0.566443  | -1.779681 |
| C  | 2.645443  | 1.201902  | -0.873290 |
| C  | 3.432890  | 0.181924  | -0.238259 |
| C  | 2.986221  | -1.082042 | -0.713460 |
| C  | 1.918201  | -0.847980 | -1.652487 |
| C  | -2.027880 | 0.001627  | -0.006401 |
| C  | -2.609720 | 1.280657  | -0.138001 |
| C  | -4.138722 | -1.080972 | -0.342012 |
| C  | -2.765377 | -1.198155 | -0.107350 |
| C  | 0.799435  | 1.251141  | -2.733599 |
| C  | 2.823720  | 2.687895  | -0.705606 |
| C  | 4.570565  | 0.410423  | 0.714588  |
| C  | 3.599919  | -2.417934 | -0.408372 |
| C  | -1.795577 | 2.558798  | 0.018344  |

|   |           |           |           |
|---|-----------|-----------|-----------|
| C | -1.966552 | 3.146639  | 1.434921  |
| C | -2.117533 | 3.613139  | -1.055791 |
| C | -2.101784 | -2.556737 | 0.079321  |
| C | -2.653643 | -3.640047 | -0.863090 |
| C | -2.200750 | -3.009176 | 1.551809  |
| C | -3.988972 | 1.330504  | -0.366619 |
| C | -4.747460 | 0.166513  | -0.468343 |
| C | 1.216558  | -1.904617 | -2.462163 |
| H | -0.735556 | 2.294608  | -0.103185 |
| H | -1.036890 | -2.438255 | -0.157655 |
| C | 0.550445  | 0.521600  | 3.753166  |
| H | -0.450390 | 0.323426  | 3.359083  |
| H | 0.707940  | -0.127821 | 4.618568  |
| H | 0.589614  | 1.559525  | 4.094668  |
| H | 5.520795  | 0.428428  | 0.167380  |
| H | 4.485566  | 1.365668  | 1.238278  |
| H | 4.647977  | -0.383627 | 1.462451  |
| H | 4.339228  | -2.671464 | -1.177836 |
| H | 4.119700  | -2.422478 | 0.552172  |
| H | 2.858368  | -3.220851 | -0.395758 |
| H | 1.112851  | -2.843773 | -1.912194 |
| H | 0.220655  | -1.584672 | -2.776694 |
| H | 1.792921  | -2.124147 | -3.369193 |
| H | 1.267107  | 1.330965  | -3.722350 |
| H | -0.136509 | 0.700826  | -2.857835 |
| H | 0.552387  | 2.264419  | -2.409779 |
| H | 3.541731  | 3.065170  | -1.443662 |
| H | 1.890180  | 3.235985  | -0.858394 |
| H | 3.210179  | 2.949540  | 0.282606  |
| H | -4.477838 | 2.294156  | -0.465468 |
| H | -5.816089 | 0.231227  | -0.647382 |
| H | -4.743016 | -1.977803 | -0.426025 |
| H | -2.621415 | -3.320615 | -1.909232 |
| H | -2.062270 | -4.556074 | -0.767149 |
| H | -3.688693 | -3.902133 | -0.623369 |
| H | -1.673854 | -3.957463 | 1.702877  |
| H | -1.773520 | -2.264733 | 2.231751  |
| H | -3.246426 | -3.156024 | 1.841215  |
| H | -3.007813 | 3.435739  | 1.609093  |
| H | -1.693266 | 2.421387  | 2.208139  |
| H | -1.345178 | 4.039479  | 1.563569  |
| H | -2.018940 | 3.204002  | -2.065868 |
| H | -3.135441 | 4.000400  | -0.951300 |
| H | -1.439404 | 4.467673  | -0.962152 |
| C | 1.629222  | 0.234409  | 2.703104  |
| H | 1.522107  | 1.074925  | 1.917863  |
| C | 1.582582  | -1.131418 | 2.044482  |
| H | 0.720770  | -1.731742 | 2.348972  |
| H | 2.508114  | -1.698275 | 2.105588  |
| H | 2.632437  | 0.457268  | 3.077016  |

72

1E-fsi

|    |           |           |           |
|----|-----------|-----------|-----------|
| Ti | -0.977342 | -0.153277 | 0.300528  |
| O  | 0.783832  | 0.121994  | 0.353359  |
| C  | -0.910570 | -1.202692 | -1.803318 |
| C  | -1.798651 | -1.992932 | -1.022035 |
| C  | -2.958123 | -1.196781 | -0.716163 |
| C  | -2.778350 | 0.086675  | -1.305481 |
| C  | -1.497611 | 0.093584  | -1.952199 |

|   |           |           |           |
|---|-----------|-----------|-----------|
| C | 2.133638  | 0.252932  | 0.136417  |
| C | 2.973325  | -0.874988 | 0.294881  |
| C | 4.011535  | 1.642711  | -0.427614 |
| C | 2.634033  | 1.529089  | -0.217580 |
| C | 0.363596  | -1.665736 | -2.448638 |
| C | -1.606128 | -3.453165 | -0.713324 |
| C | -4.226338 | -1.683748 | -0.070775 |
| C | -3.821179 | 1.155272  | -1.450162 |
| C | 2.451871  | -2.229171 | 0.759045  |
| C | 2.783087  | -2.451826 | 2.250953  |
| C | 2.983180  | -3.403310 | -0.084844 |
| C | 1.731504  | 2.752521  | -0.312101 |
| C | 2.050231  | 3.650859  | -1.520613 |
| C | 1.788589  | 3.562372  | 1.000868  |
| C | 4.342685  | -0.692104 | 0.076343  |
| C | 4.861175  | 0.548111  | -0.286278 |
| C | -0.942741 | 1.216516  | -2.780513 |
| H | 1.360023  | -2.221589 | 0.653889  |
| H | 0.703310  | 2.399473  | -0.434190 |
| C | -3.308296 | 3.173879  | 2.317460  |
| H | -2.482547 | 3.612199  | 2.887244  |
| H | -3.504529 | 3.824936  | 1.459378  |
| H | -4.198043 | 3.178649  | 2.955352  |
| H | -4.947573 | -1.974691 | -0.844028 |
| H | -4.065273 | -2.561056 | 0.559221  |
| H | -4.704468 | -0.912010 | 0.538531  |
| H | -4.264788 | 1.097576  | -2.451714 |
| H | -4.633568 | 1.041027  | -0.730753 |
| H | -3.409755 | 2.162021  | -1.339848 |
| H | -1.245803 | 2.196002  | -2.402402 |
| H | 0.148191  | 1.190314  | -2.826498 |
| H | -1.315163 | 1.137422  | -3.809813 |
| H | 0.188390  | -1.867631 | -3.512301 |
| H | 1.159977  | -0.920135 | -2.383947 |
| H | 0.731511  | -2.589256 | -1.998622 |
| H | -1.747229 | -4.047660 | -1.623608 |
| H | -0.600421 | -3.674914 | -0.342229 |
| H | -2.328045 | -3.819852 | 0.019249  |
| H | 5.016008  | -1.534611 | 0.196511  |
| H | 5.927642  | 0.663224  | -0.452380 |
| H | 4.428089  | 2.606331  | -0.701026 |
| H | 2.048147  | 3.086316  | -2.458410 |
| H | 1.304355  | 4.448050  | -1.601019 |
| H | 3.026551  | 4.135788  | -1.425963 |
| H | 1.100093  | 4.413017  | 0.960791  |
| H | 1.522529  | 2.945809  | 1.865660  |
| H | 2.796958  | 3.953079  | 1.172394  |
| H | 3.865487  | -2.517578 | 2.399430  |
| H | 2.426124  | -1.626982 | 2.876801  |
| H | 2.799875  | -3.253386 | -1.152617 |
| H | 4.060281  | -3.540967 | 0.048299  |
| H | 2.501324  | -4.338210 | 0.220098  |
| C | -2.968214 | 1.745654  | 1.858175  |
| H | -2.837207 | 1.120170  | 2.751796  |
| C | -1.704406 | 1.692366  | 0.984656  |
| H | -0.833789 | 2.025912  | 1.570417  |
| H | -1.789199 | 2.390396  | 0.142292  |
| H | -3.829128 | 1.332236  | 1.321532  |
| C | -1.866990 | -1.645063 | 2.300358  |
| H | -2.849039 | -1.188145 | 2.378403  |

|   |           |           |          |
|---|-----------|-----------|----------|
| C | -0.757701 | -1.011277 | 2.732871 |
| H | -0.802879 | -0.014624 | 3.164674 |
| H | 2.341237  | -3.385770 | 2.615767 |
| H | -1.826537 | -2.673241 | 1.956129 |
| H | 0.210846  | -1.499977 | 2.736699 |

72

**1TS(E-F)-fsi**

|    |           |           |           |
|----|-----------|-----------|-----------|
| Ti | -0.975737 | -0.133706 | 0.205595  |
| O  | 0.781823  | 0.105061  | 0.358163  |
| C  | -0.830739 | -1.345778 | -1.797114 |
| C  | -1.745743 | -2.070978 | -0.971371 |
| C  | -2.921046 | -1.259432 | -0.790163 |
| C  | -2.718325 | -0.035687 | -1.473245 |
| C  | -1.407614 | -0.071353 | -2.073936 |
| C  | 2.136598  | 0.241900  | 0.153660  |
| C  | 2.978864  | -0.858269 | 0.432360  |
| C  | 4.012499  | 1.591702  | -0.498196 |
| C  | 2.630401  | 1.481741  | -0.311181 |
| C  | 0.468915  | -1.859620 | -2.347585 |
| C  | -1.593040 | -3.513075 | -0.573047 |
| C  | -4.183902 | -1.679488 | -0.092562 |
| C  | -3.733626 | 1.051933  | -1.684217 |
| C  | 2.430383  | -2.161759 | 0.998422  |
| C  | 2.451395  | -2.125055 | 2.541986  |
| C  | 3.154992  | -3.414738 | 0.477265  |
| C  | 1.715197  | 2.678465  | -0.536089 |
| C  | 2.090613  | 3.515059  | -1.771677 |
| C  | 1.669636  | 3.564077  | 0.727525  |
| C  | 4.351004  | -0.684301 | 0.224914  |
| C  | 4.867144  | 0.524042  | -0.236823 |
| C  | -0.832953 | 0.970995  | -2.993812 |
| H  | 1.384247  | -2.242375 | 0.680049  |
| H  | 0.703480  | 2.293995  | -0.706599 |
| C  | -3.092435 | 2.828033  | 2.983864  |
| H  | -2.996767 | 2.026828  | 3.722460  |
| H  | -2.282040 | 3.543309  | 3.158601  |
| H  | -4.037393 | 3.341833  | 3.180305  |
| H  | -4.847721 | -2.198557 | -0.794665 |
| H  | -3.997973 | -2.371400 | 0.733178  |
| H  | -4.739087 | -0.825022 | 0.302608  |
| H  | -4.257102 | 0.886572  | -2.633734 |
| H  | -4.490241 | 1.073042  | -0.897794 |
| H  | -3.276881 | 2.043798  | -1.742467 |
| H  | -1.161806 | 1.980836  | -2.734610 |
| H  | 0.259275  | 0.960797  | -2.988895 |
| H  | -1.156950 | 0.780821  | -4.024522 |
| H  | 0.322938  | -2.211170 | -3.376234 |
| H  | 1.243400  | -1.089124 | -2.371058 |
| H  | 0.851976  | -2.701338 | -1.767413 |
| H  | -1.819573 | -4.159585 | -1.429294 |
| H  | -0.576313 | -3.751037 | -0.248601 |
| H  | -2.278634 | -3.797886 | 0.228005  |
| H  | 5.027885  | -1.506753 | 0.429219  |
| H  | 5.936062  | 0.634336  | -0.389904 |
| H  | 4.427408  | 2.529678  | -0.851370 |
| H  | 2.165550  | 2.897834  | -2.672322 |
| H  | 1.332558  | 4.284978  | -1.947740 |
| H  | 3.045783  | 4.032499  | -1.641163 |
| H  | 0.962384  | 4.390862  | 0.599280  |

|   |           |           |           |
|---|-----------|-----------|-----------|
| H | 1.375705  | 2.989581  | 1.612286  |
| H | 2.655212  | 3.994729  | 0.931871  |
| H | 3.480353  | -2.061088 | 2.910091  |
| H | 1.912582  | -1.255697 | 2.934073  |
| H | 3.190696  | -3.437116 | -0.616349 |
| H | 4.183010  | -3.476896 | 0.846717  |
| H | 2.638868  | -4.316743 | 0.821594  |
| C | -3.060820 | 2.305565  | 1.540974  |
| H | -3.905610 | 1.627898  | 1.365931  |
| C | -1.747798 | 1.635326  | 1.155162  |
| H | -0.889632 | 2.088149  | 1.659564  |
| H | -1.564801 | 1.768331  | 0.041572  |
| H | -3.226150 | 3.157711  | 0.867184  |
| C | -1.327316 | -1.485450 | 2.051486  |
| H | -2.039032 | -2.251288 | 1.774436  |
| C | -1.776912 | -0.310612 | 2.617679  |
| H | -2.838926 | -0.122644 | 2.724541  |
| H | 2.002747  | -3.032159 | 2.962378  |
| H | -0.303005 | -1.806402 | 2.219376  |
| H | -1.117090 | 0.307460  | 3.215348  |

72

**1F-fsi**

|    |           |           |           |
|----|-----------|-----------|-----------|
| Ti | -0.965985 | -0.239075 | 0.139597  |
| O  | 0.780922  | 0.060191  | 0.289483  |
| C  | -1.397430 | -2.227247 | -1.030835 |
| C  | -2.690469 | -1.744199 | -0.654702 |
| C  | -2.880233 | -0.475282 | -1.275791 |
| C  | -1.719396 | -0.190540 | -2.072722 |
| C  | -0.807388 | -1.277461 | -1.931261 |
| C  | 2.134073  | 0.223173  | 0.126673  |
| C  | 2.995799  | -0.769399 | 0.645725  |
| C  | 3.992107  | 1.525602  | -0.654444 |
| C  | 2.606336  | 1.381304  | -0.529548 |
| C  | -0.809327 | -3.554206 | -0.643687 |
| C  | -3.717251 | -2.496796 | 0.137975  |
| C  | -4.141477 | 0.344655  | -1.235700 |
| C  | -1.547249 | 1.002584  | -2.972449 |
| C  | 2.457328  | -1.977424 | 1.401769  |
| C  | 2.455150  | -1.703774 | 2.920977  |
| C  | 3.209798  | -3.281161 | 1.083192  |
| C  | 1.663067  | 2.469676  | -1.026132 |
| C  | 2.012696  | 2.972830  | -2.438271 |
| C  | 1.609517  | 3.642225  | -0.024103 |
| C  | 4.370288  | -0.569587 | 0.483528  |
| C  | 4.867734  | 0.562697  | -0.158399 |
| C  | 0.501129  | -1.440694 | -2.651067 |
| H  | 1.415378  | -2.122198 | 1.095791  |
| H  | 0.655828  | 2.038748  | -1.080113 |
| C  | -2.710966 | 3.341570  | 3.175454  |
| H  | -3.107210 | 2.595225  | 3.870172  |
| H  | -1.684993 | 3.578582  | 3.476665  |
| H  | -3.309981 | 4.247868  | 3.299277  |
| H  | -4.821587 | 0.024667  | -2.034424 |
| H  | -4.681329 | 0.227968  | -0.292310 |
| H  | -3.950353 | 1.410126  | -1.389280 |
| H  | -2.021178 | 0.809783  | -3.942749 |
| H  | -2.014123 | 1.903821  | -2.564284 |
| H  | -0.495691 | 1.224869  | -3.164431 |
| H  | 0.958062  | -0.479375 | -2.895447 |

|   |           |           |           |
|---|-----------|-----------|-----------|
| H | 1.225407  | -2.007914 | -2.062376 |
| H | 0.345846  | -1.981448 | -3.592288 |
| H | -1.152223 | -4.332919 | -1.336155 |
| H | 0.282140  | -3.544553 | -0.683058 |
| H | -1.107701 | -3.856685 | 0.363040  |
| H | -4.416376 | -2.998450 | -0.542100 |
| H | -3.266275 | -3.270246 | 0.762970  |
| H | -4.312362 | -1.842545 | 0.781540  |
| H | 5.064061  | -1.309200 | 0.868906  |
| H | 5.939262  | 0.696002  | -0.269357 |
| H | 4.393316  | 2.406374  | -1.145257 |
| H | 2.075749  | 2.149726  | -3.157447 |
| H | 1.251755  | 3.677650  | -2.788905 |
| H | 2.970996  | 3.500391  | -2.456606 |
| H | 0.893882  | 4.403868  | -0.352786 |
| H | 1.320392  | 3.303118  | 0.976413  |
| H | 2.589820  | 4.121110  | 0.064974  |
| H | 3.475584  | -1.558100 | 3.290356  |
| H | 1.885378  | -0.801147 | 3.165665  |
| H | 3.250178  | -3.473239 | 0.006132  |
| H | 4.238127  | -3.263702 | 1.457004  |
| H | 2.710257  | -4.128860 | 1.562914  |
| C | -2.770633 | 2.874849  | 1.717243  |
| H | -3.802537 | 2.629549  | 1.439472  |
| C | -1.867344 | 1.656310  | 1.413943  |
| H | -0.835128 | 1.899399  | 1.694951  |
| H | -1.906642 | 1.605147  | 0.289908  |
| H | -2.456541 | 3.695875  | 1.063654  |
| C | -1.504042 | -0.949995 | 1.971433  |
| H | -2.096445 | -1.839261 | 2.170670  |
| C | -2.343923 | 0.351069  | 2.140994  |
| H | -3.387533 | 0.169115  | 1.868841  |
| H | 2.017118  | -2.546690 | 3.466296  |
| H | -0.610955 | -0.939212 | 2.603596  |
| H | -2.324438 | 0.610201  | 3.204397  |

72

**1E-bsi**

|    |           |           |           |
|----|-----------|-----------|-----------|
| Ti | 1.073516  | -0.173059 | 0.457679  |
| O  | -0.725408 | -0.106127 | 0.388391  |
| C  | 2.079310  | 1.164605  | -1.198681 |
| C  | 3.201564  | 0.641107  | -0.456545 |
| C  | 3.236333  | -0.758040 | -0.646233 |
| C  | 2.132830  | -1.123784 | -1.497346 |
| C  | 1.435711  | 0.070456  | -1.853052 |
| C  | -2.065729 | -0.009500 | 0.049181  |
| C  | -2.624022 | 1.247466  | -0.288636 |
| C  | -4.189647 | -1.087488 | -0.344563 |
| C  | -2.853407 | -1.186240 | 0.055231  |
| C  | 1.818435  | 2.622877  | -1.457393 |
| C  | 4.274444  | 1.439435  | 0.228534  |
| C  | 4.331300  | -1.651886 | -0.136345 |
| C  | 1.906912  | -2.458236 | -2.153744 |
| C  | -1.869877 | 2.568336  | -0.199876 |
| C  | -2.410295 | 3.420678  | 0.968446  |
| C  | -1.930838 | 3.378852  | -1.510018 |
| C  | -2.309091 | -2.542410 | 0.478189  |
| C  | -2.141688 | -3.483816 | -0.731525 |
| C  | -3.166400 | -3.203835 | 1.574954  |
| C  | -3.970266 | 1.278871  | -0.672892 |

|   |           |           |           |
|---|-----------|-----------|-----------|
| C | -4.750021 | 0.129170  | -0.717023 |
| C | 0.302168  | 0.149983  | -2.835612 |
| H | -0.818537 | 2.347233  | 0.005778  |
| H | -1.324330 | -2.370940 | 0.912920  |
| H | 5.288529  | -1.353857 | -0.580119 |
| H | 4.452475  | -1.585289 | 0.950179  |
| H | 4.172005  | -2.699182 | -0.399969 |
| H | 2.338869  | -2.443560 | -3.161698 |
| H | 2.379886  | -3.281712 | -1.616402 |
| H | 0.844911  | -2.692170 | -2.266402 |
| H | -0.312962 | 1.036843  | -2.680013 |
| H | 0.694292  | 0.194831  | -3.859049 |
| H | -0.355229 | -0.720749 | -2.774660 |
| H | 2.483975  | 2.974444  | -2.255383 |
| H | 0.794801  | 2.806210  | -1.785287 |
| H | 2.011016  | 3.247430  | -0.581433 |
| H | 5.200722  | 1.392940  | -0.357033 |
| H | 4.009113  | 2.493992  | 0.320544  |
| H | 4.512244  | 1.057635  | 1.226683  |
| H | -4.417657 | 2.231969  | -0.936065 |
| H | -5.789624 | 0.183632  | -1.023908 |
| H | -4.802631 | -1.983173 | -0.356966 |
| H | -1.504487 | -3.039023 | -1.504460 |
| H | -1.701232 | -4.439777 | -0.426991 |
| H | -3.108687 | -3.699703 | -1.196568 |
| H | -2.693895 | -4.130402 | 1.917655  |
| H | -3.289821 | -2.542329 | 2.437890  |
| H | -4.164504 | -3.464407 | 1.210692  |
| H | -3.449951 | 3.710821  | 0.787377  |
| H | -2.381277 | 2.875055  | 1.915080  |
| H | -1.825695 | 4.340297  | 1.080479  |
| H | -1.590817 | 2.798446  | -2.373350 |
| H | -2.949638 | 3.712583  | -1.727625 |
| H | -1.308985 | 4.276901  | -1.432213 |
| C | 1.409097  | 1.795329  | 2.009255  |
| C | 1.787788  | 0.379666  | 2.376930  |
| H | 1.213297  | 0.016675  | 3.228480  |
| H | 2.852952  | 0.206000  | 2.533033  |
| C | 0.422487  | 2.454785  | 2.980563  |
| H | -0.474928 | 1.842292  | 3.105046  |
| H | 0.896326  | 2.565298  | 3.960054  |
| H | 0.913163  | 1.836046  | 0.989229  |
| C | 1.057549  | -2.267158 | 2.173140  |
| H | 0.060623  | -2.034945 | 2.535384  |
| C | 1.274863  | -2.740549 | 0.928022  |
| H | 0.460920  | -2.955842 | 0.244187  |
| H | 2.259542  | -3.084011 | 0.641022  |
| H | 1.863753  | -2.203027 | 2.894813  |
| H | 0.116291  | 3.444756  | 2.634470  |
| H | 2.294041  | 2.416072  | 1.850768  |

72

**1TS(E-F)-bsi**

|    |           |           |           |
|----|-----------|-----------|-----------|
| Ti | 1.081019  | -0.244763 | 0.396124  |
| O  | -0.715363 | -0.154760 | 0.285885  |
| C  | 2.035006  | 1.290080  | -1.110576 |
| C  | 3.164674  | 0.791968  | -0.370147 |
| C  | 3.308518  | -0.585197 | -0.655538 |
| C  | 2.263111  | -0.962641 | -1.567768 |
| C  | 1.492401  | 0.204205  | -1.863374 |

|   |           |           |           |
|---|-----------|-----------|-----------|
| C | -2.065259 | -0.038596 | 0.004370  |
| C | -2.632675 | 1.229534  | -0.272407 |
| C | -4.210654 | -1.098118 | -0.323681 |
| C | -2.860019 | -1.213347 | 0.015095  |
| C | 1.689620  | 2.745500  | -1.266768 |
| C | 4.130292  | 1.626477  | 0.423132  |
| C | 4.432433  | -1.454470 | -0.169086 |
| C | 2.136839  | -2.279702 | -2.279305 |
| C | -1.873202 | 2.547185  | -0.181652 |
| C | -2.402604 | 3.402266  | 0.990294  |
| C | -1.947874 | 3.362195  | -1.488773 |
| C | -2.288265 | -2.580454 | 0.362763  |
| C | -1.902291 | -3.353269 | -0.915828 |
| C | -3.222540 | -3.428300 | 1.245672  |
| C | -3.994152 | 1.276267  | -0.598473 |
| C | -4.779498 | 0.131301  | -0.640777 |
| C | 0.386376  | 0.279985  | -2.877702 |
| H | -0.821232 | 2.320588  | 0.015467  |
| H | -1.383662 | -2.407586 | 0.950435  |
| H | 5.344202  | -1.239200 | -0.739475 |
| H | 4.668896  | -1.278242 | 0.885042  |
| H | 4.224320  | -2.518776 | -0.296882 |
| H | 2.653338  | -2.227013 | -3.245369 |
| H | 2.586227  | -3.103565 | -1.721453 |
| H | 1.095669  | -2.540763 | -2.484270 |
| H | -0.348925 | 1.045658  | -2.627888 |
| H | 0.797302  | 0.523282  | -3.865093 |
| H | -0.146507 | -0.669063 | -2.971422 |
| H | 2.430236  | 3.228312  | -1.916115 |
| H | 0.713338  | 2.886039  | -1.728998 |
| H | 1.696870  | 3.289778  | -0.317542 |
| H | 4.998958  | 1.877804  | -0.197927 |
| H | 3.690761  | 2.571286  | 0.749792  |
| H | 4.515918  | 1.103525  | 1.303667  |
| H | -4.448203 | 2.237747  | -0.815765 |
| H | -5.830867 | 0.197418  | -0.902044 |
| H | -4.830467 | -1.988117 | -0.332371 |
| H | -1.209006 | -2.780711 | -1.541992 |
| H | -1.436028 | -4.314271 | -0.671295 |
| H | -2.790679 | -3.558654 | -1.521531 |
| H | -2.703528 | -4.334985 | 1.572908  |
| H | -3.542362 | -2.878158 | 2.135634  |
| H | -4.119566 | -3.750437 | 0.708618  |
| H | -3.429434 | 3.729613  | 0.800201  |
| H | -2.406787 | 2.845346  | 1.930344  |
| H | -1.790393 | 4.301570  | 1.120341  |
| H | -1.605161 | 2.790432  | -2.356469 |
| H | -2.972831 | 3.681421  | -1.699103 |
| H | -1.338505 | 4.268659  | -1.410686 |
| C | 1.223834  | 1.429942  | 2.281241  |
| C | 1.792277  | 0.037829  | 2.532553  |
| H | 1.518766  | -0.281925 | 3.532751  |
| H | 2.875530  | -0.024605 | 2.420704  |
| C | 0.032143  | 1.764262  | 3.181648  |
| H | -0.794047 | 1.065528  | 3.022875  |
| H | 0.332813  | 1.707278  | 4.231998  |
| H | 0.909736  | 1.629853  | 1.220623  |
| C | 1.198546  | -2.024104 | 2.131125  |
| H | 0.231974  | -1.950162 | 2.620097  |
| C | 1.275540  | -2.418491 | 0.788014  |



|   |           |           |          |
|---|-----------|-----------|----------|
| H | 0.381250  | -2.751666 | 0.273682 |
| H | 2.200674  | -2.865139 | 0.449634 |
| H | 2.029549  | -2.244614 | 2.790741 |
| H | -0.335275 | 2.774245  | 2.990683 |
| H | 2.032145  | 2.161299  | 2.391311 |

72

**1F-bsi**

|    |           |           |           |
|----|-----------|-----------|-----------|
| Ti | 1.061061  | -0.045135 | 0.160428  |
| O  | -0.714347 | 0.006065  | 0.325437  |
| C  | 2.450728  | 0.815844  | -1.559550 |
| C  | 3.186937  | -0.276212 | -0.991501 |
| C  | 2.428826  | -1.465622 | -1.182127 |
| C  | 1.215848  | -1.108636 | -1.873251 |
| C  | 1.249550  | 0.296636  | -2.131519 |
| C  | -2.070753 | -0.003440 | 0.090624  |
| C  | -2.725271 | 1.210954  | -0.214939 |
| C  | -4.132684 | -1.226432 | -0.065138 |
| C  | -2.757724 | -1.237139 | 0.187381  |
| C  | 2.899417  | 2.250764  | -1.628112 |
| C  | 4.548582  | -0.197019 | -0.362816 |
| C  | 2.880988  | -2.864073 | -0.882227 |
| C  | 0.182900  | -2.066893 | -2.395645 |
| C  | -2.009328 | 2.556212  | -0.211826 |
| C  | -2.333282 | 3.331293  | 1.083204  |
| C  | -2.334792 | 3.417845  | -1.446293 |
| C  | -2.047213 | -2.514850 | 0.616724  |
| C  | -2.599523 | -3.784865 | -0.052147 |
| C  | -2.079548 | -2.652317 | 2.154174  |
| C  | -4.104246 | 1.154200  | -0.448979 |
| C  | -4.802993 | -0.047478 | -0.385013 |
| C  | 0.237005  | 1.061658  | -2.934190 |
| H  | -0.928790 | 2.363821  | -0.222704 |
| H  | -0.997324 | -2.424716 | 0.317216  |
| H  | 3.349227  | -3.298834 | -1.773696 |
| H  | 3.621326  | -2.894797 | -0.080300 |
| H  | 2.050964  | -3.516343 | -0.600181 |
| H  | 0.420426  | -2.336894 | -3.432028 |
| H  | 0.154100  | -2.992898 | -1.817755 |
| H  | -0.819895 | -1.633154 | -2.391099 |
| H  | 0.252761  | 2.129426  | -2.705929 |
| H  | 0.454917  | 0.955454  | -4.004004 |
| H  | -0.778894 | 0.694931  | -2.769512 |
| H  | 3.395009  | 2.443085  | -2.587322 |
| H  | 2.061533  | 2.950734  | -1.558008 |
| H  | 3.615020  | 2.498974  | -0.840946 |
| H  | 5.320090  | -0.427487 | -1.107468 |
| H  | 4.767193  | 0.800064  | 0.026750  |
| H  | 4.666426  | -0.912965 | 0.454751  |
| H  | -4.640289 | 2.069122  | -0.679687 |
| H  | -5.871562 | -0.065240 | -0.574856 |
| H  | -4.691056 | -2.154121 | -0.005409 |
| H  | -2.629230 | -3.691298 | -1.142153 |
| H  | -1.968878 | -4.643403 | 0.199809  |
| H  | -3.610632 | -4.022918 | 0.291981  |
| H  | -1.524694 | -3.540361 | 2.476273  |
| H  | -1.644144 | -1.777046 | 2.645871  |
| H  | -3.110148 | -2.753564 | 2.509521  |
| H  | -3.398956 | 3.577459  | 1.127485  |
| H  | -2.096242 | 2.745354  | 1.976444  |

|   |           |           |           |
|---|-----------|-----------|-----------|
| H | -1.771660 | 4.270639  | 1.126044  |
| H | -2.151476 | 2.879876  | -2.380583 |
| H | -3.380739 | 3.738682  | -1.449165 |
| H | -1.722088 | 4.325413  | -1.446064 |
| C | 2.341794  | 1.690207  | 2.192551  |
| C | 2.382654  | 0.546383  | 3.218625  |
| H | 2.232069  | 0.977593  | 4.215279  |
| H | 3.385486  | 0.102963  | 3.221633  |
| C | 1.145145  | 2.639949  | 2.315655  |
| H | 0.182971  | 2.121139  | 2.272134  |
| H | 1.188754  | 3.155926  | 3.279578  |
| H | 2.423173  | 1.266704  | 1.154426  |
| C | 1.350921  | -0.562904 | 2.963898  |
| H | 0.334050  | -0.146877 | 2.967708  |
| C | 1.629737  | -1.357455 | 1.667769  |
| H | 0.971976  | -2.232566 | 1.591958  |
| H | 2.664323  | -1.709346 | 1.644396  |
| H | 1.370258  | -1.266312 | 3.807518  |
| H | 1.155269  | 3.405690  | 1.533903  |
| H | 3.268769  | 2.272855  | 2.243299  |

66

**1TS<sub>E</sub>**

|    |           |           |           |
|----|-----------|-----------|-----------|
| Ti | -1.122061 | 0.062238  | 0.376366  |
| O  | 0.646784  | 0.004855  | 0.290869  |
| C  | -1.613026 | -0.481668 | -1.809835 |
| C  | -2.508322 | -1.251187 | -0.997795 |
| C  | -3.403614 | -0.336620 | -0.338177 |
| C  | -3.035357 | 0.982430  | -0.706475 |
| C  | -1.910509 | 0.900587  | -1.603037 |
| C  | 1.992514  | 0.046037  | 0.014410  |
| C  | 2.687505  | -1.169487 | -0.159245 |
| C  | 3.990994  | 1.328035  | -0.326362 |
| C  | 2.617717  | 1.310478  | -0.065686 |
| C  | -0.583794 | -1.026399 | -2.759986 |
| C  | -2.624395 | -2.749911 | -0.995584 |
| C  | -4.555707 | -0.731895 | 0.539780  |
| C  | -3.730920 | 2.255311  | -0.307923 |
| C  | 2.001149  | -2.523525 | -0.030775 |
| C  | 2.323234  | -3.170283 | 1.332546  |
| C  | 2.350445  | -3.479375 | -1.186450 |
| C  | 1.844946  | 2.599546  | 0.185112  |
| C  | 2.248255  | 3.747900  | -0.755673 |
| C  | 1.974592  | 3.030099  | 1.661800  |
| C  | 4.060724  | -1.084139 | -0.415668 |
| C  | 4.708485  | 0.145615  | -0.499873 |
| C  | -1.269778 | 2.060441  | -2.316245 |
| H  | 0.919481  | -2.353810 | -0.063167 |
| H  | 0.783192  | 2.391959  | -0.007417 |
| C  | -0.555474 | -0.962022 | 3.661918  |
| H  | 0.412812  | -0.512016 | 3.431995  |
| H  | -0.748147 | -0.825479 | 4.734688  |
| H  | -0.512946 | -2.036064 | 3.471734  |
| H  | -5.453728 | -0.898018 | -0.067605 |
| H  | -4.356303 | -1.661438 | 1.078813  |
| H  | -4.805065 | 0.041681  | 1.271176  |
| H  | -4.404933 | 2.578971  | -1.110121 |
| H  | -4.340331 | 2.129872  | 0.590285  |
| H  | -3.030935 | 3.078188  | -0.132877 |
| H  | -1.281523 | 2.974216  | -1.715683 |

|   |           |           |           |
|---|-----------|-----------|-----------|
| H | -0.233332 | 1.849752  | -2.589447 |
| H | -1.814722 | 2.278554  | -3.242857 |
| H | -1.000763 | -1.074309 | -3.773137 |
| H | 0.310995  | -0.400446 | -2.802483 |
| H | -0.272938 | -2.036962 | -2.487664 |
| H | -3.268440 | -3.075386 | -1.821447 |
| H | -1.654692 | -3.235215 | -1.127422 |
| H | -3.059906 | -3.123343 | -0.066751 |
| H | 4.632450  | -1.996737 | -0.549947 |
| H | 5.774597  | 0.184074  | -0.700266 |
| H | 4.509424  | 2.278700  | -0.392168 |
| H | 2.187180  | 3.449059  | -1.806474 |
| H | 1.587943  | 4.607923  | -0.605056 |
| H | 3.269141  | 4.091683  | -0.564028 |
| H | 1.367902  | 3.919343  | 1.865385  |
| H | 1.662785  | 2.231821  | 2.344282  |
| H | 3.014671  | 3.272498  | 1.902094  |
| H | 3.395313  | -3.371869 | 1.426046  |
| H | 2.035723  | -2.517580 | 2.162952  |
| H | 1.792321  | -4.121730 | 1.443666  |
| H | 2.143878  | -3.027184 | -2.161557 |
| H | 3.405868  | -3.768050 | -1.172104 |
| H | 1.764393  | -4.400569 | -1.104181 |
| C | -1.677398 | -0.304183 | 2.917099  |
| H | -1.489692 | -1.325443 | 1.250286  |
| C | -1.631341 | 0.980577  | 2.418427  |
| H | -0.733288 | 1.582543  | 2.563931  |
| H | -2.556574 | 1.509669  | 2.202826  |
| H | -2.646320 | -0.795109 | 2.978888  |

66

# 1H-E

|    |           |           |           |
|----|-----------|-----------|-----------|
| Ti | -1.139276 | -0.010215 | 0.381539  |
| O  | 0.630250  | -0.006814 | 0.303913  |
| C  | -1.639483 | -0.715495 | -1.751015 |
| C  | -2.645091 | -1.285515 | -0.900246 |
| C  | -3.422314 | -0.205009 | -0.358709 |
| C  | -2.889904 | 1.015658  | -0.857452 |
| C  | -1.778082 | 0.705416  | -1.712275 |
| C  | 1.969198  | 0.036964  | -0.002638 |
| C  | 2.674323  | -1.179011 | -0.133504 |
| C  | 3.944622  | 1.321674  | -0.452040 |
| C  | 2.578804  | 1.302767  | -0.154375 |
| C  | -0.666395 | -1.479148 | -2.604833 |
| C  | -2.972254 | -2.746964 | -0.780216 |
| C  | -4.619294 | -0.368996 | 0.534135  |
| C  | -3.417920 | 2.400222  | -0.598485 |
| C  | 2.006975  | -2.529794 | 0.092721  |
| C  | 2.303508  | -3.045568 | 1.516773  |
| C  | 2.399987  | -3.579829 | -0.961865 |
| C  | 1.800447  | 2.593995  | 0.067478  |
| C  | 2.190422  | 3.721562  | -0.903329 |
| C  | 1.939714  | 3.062251  | 1.531980  |
| C  | 4.038996  | -1.091451 | -0.430813 |
| C  | 4.669889  | 0.139654  | -0.591333 |
| C  | -0.989791 | 1.690564  | -2.530433 |
| H  | 0.924312  | -2.384028 | 0.020047  |
| H  | 0.739154  | 2.375171  | -0.110777 |
| C  | -0.436743 | -0.571841 | 3.835614  |
| H  | 0.472268  | -0.009457 | 3.611974  |

|   |           |           |           |
|---|-----------|-----------|-----------|
| H | -0.627912 | -0.510456 | 4.915558  |
| H | -0.280775 | -1.629149 | 3.603727  |
| H | -5.513473 | -0.578454 | -0.065414 |
| H | -4.497044 | -1.204912 | 1.228515  |
| H | -4.830989 | 0.531468  | 1.116543  |
| H | -4.019408 | 2.734660  | -1.452245 |
| H | -4.063429 | 2.440430  | 0.281962  |
| H | -2.617953 | 3.135859  | -0.468669 |
| H | -0.969963 | 2.683389  | -2.074138 |
| H | 0.043092  | 1.366340  | -2.677869 |
| H | -1.443696 | 1.800224  | -3.522924 |
| H | -1.082262 | -1.619106 | -3.609983 |
| H | 0.284870  | -0.952595 | -2.713925 |
| H | -0.457338 | -2.470724 | -2.197976 |
| H | -3.657799 | -3.039750 | -1.584821 |
| H | -2.081020 | -3.372134 | -0.862641 |
| H | -3.455210 | -2.979102 | 0.170852  |
| H | 4.617966  | -2.002988 | -0.536342 |
| H | 5.729665  | 0.179272  | -0.822791 |
| H | 4.451071  | 2.273130  | -0.574129 |
| H | 2.126830  | 3.396720  | -1.946155 |
| H | 1.523744  | 4.579705  | -0.770693 |
| H | 3.209031  | 4.078984  | -0.724924 |
| H | 1.330486  | 3.953773  | 1.718241  |
| H | 1.637309  | 2.279679  | 2.236681  |
| H | 2.980371  | 3.315473  | 1.758116  |
| H | 3.375901  | -3.219295 | 1.653503  |
| H | 1.985296  | -2.324788 | 2.276762  |
| H | 1.783110  | -3.991441 | 1.700852  |
| H | 2.218691  | -3.219269 | -1.979183 |
| H | 3.456087  | -3.857371 | -0.890191 |
| H | 1.817952  | -4.495307 | -0.814490 |
| C | -1.631687 | -0.035392 | 3.121410  |
| H | -1.451876 | -1.458756 | 1.128079  |
| C | -1.679739 | 1.132509  | 2.423329  |
| H | -0.813255 | 1.795679  | 2.401871  |
| H | -2.637112 | 1.546544  | 2.116345  |
| H | -2.553749 | -0.603529 | 3.236209  |

72

# 1G

|    |           |           |           |
|----|-----------|-----------|-----------|
| Ti | -0.977359 | -0.153220 | 0.300409  |
| O  | 0.783810  | 0.122060  | 0.353356  |
| C  | -1.798681 | -1.992962 | -1.022089 |
| C  | -2.958129 | -1.196791 | -0.716241 |
| C  | -2.778346 | 0.086650  | -1.305603 |
| C  | -1.497616 | 0.093520  | -1.952335 |
| C  | -0.910583 | -1.202753 | -1.803392 |
| C  | 2.133631  | 0.252998  | 0.136424  |
| C  | 2.973310  | -0.874935 | 0.294855  |
| C  | 4.011514  | 1.642761  | -0.427680 |
| C  | 2.634019  | 1.529155  | -0.217584 |
| C  | -1.606107 | -3.453152 | -0.713201 |
| C  | -4.226308 | -1.683633 | -0.070699 |
| C  | -3.821183 | 1.155237  | -1.450214 |
| C  | -0.942649 | 1.216434  | -2.780612 |
| C  | 2.451877  | -2.229122 | 0.759013  |
| C  | 2.783283  | -2.451857 | 2.250871  |
| C  | 2.983057  | -3.403226 | -0.084998 |
| C  | 1.731486  | 2.752586  | -0.311994 |

|             |           |           |           |
|-------------|-----------|-----------|-----------|
| C           | 2.050311  | 3.651183  | -1.520278 |
| C           | 1.788428  | 3.562175  | 1.001148  |
| C           | 4.342662  | -0.692058 | 0.076263  |
| C           | 4.861145  | 0.548153  | -0.286380 |
| C           | 0.363607  | -1.665789 | -2.448684 |
| H           | 1.360017  | -2.221509 | 0.654000  |
| H           | 0.703311  | 2.399543  | -0.434266 |
| C           | -3.308933 | 3.173532  | 2.317128  |
| H           | -2.483247 | 3.612806  | 2.886265  |
| H           | -3.506043 | 3.823919  | 1.458739  |
| H           | -4.198390 | 3.178033  | 2.955427  |
| H           | -4.265971 | 1.096538  | -2.451188 |
| H           | -4.632764 | 1.041943  | -0.729741 |
| H           | -3.409429 | 2.162018  | -1.341481 |
| H           | -1.315356 | 1.137629  | -3.809831 |
| H           | -1.245319 | 2.195953  | -2.402269 |
| H           | 0.148263  | 1.189913  | -2.826873 |
| H           | 1.160237  | -0.920513 | -2.383290 |
| H           | 0.731078  | -2.589728 | -1.999165 |
| H           | 0.188625  | -1.866933 | -3.512523 |
| H           | -1.747255 | -4.047784 | -1.623390 |
| H           | -0.600371 | -3.674818 | -0.342142 |
| H           | -2.327966 | -3.819758 | 0.019468  |
| H           | -4.947741 | -1.974342 | -0.843856 |
| H           | -4.065272 | -2.561057 | 0.559142  |
| H           | -4.704215 | -0.911898 | 0.538791  |
| H           | 5.015991  | -1.534564 | 0.196406  |
| H           | 5.927607  | 0.663250  | -0.452526 |
| H           | 4.428065  | 2.606374  | -0.701118 |
| H           | 2.048379  | 3.086830  | -2.458189 |
| H           | 1.304388  | 4.448336  | -1.600614 |
| H           | 3.026578  | 4.136175  | -1.425408 |
| H           | 1.099908  | 4.412806  | 0.961190  |
| H           | 1.522328  | 2.945429  | 1.865796  |
| H           | 2.796773  | 3.952876  | 1.172824  |
| H           | 3.865700  | -2.517647 | 2.399200  |
| H           | 2.426427  | -1.627031 | 2.876804  |
| H           | 2.341455  | -3.385805 | 2.615699  |
| H           | 2.799594  | -3.253260 | -1.152737 |
| H           | 4.060179  | -3.540891 | 0.047976  |
| H           | 2.501248  | -4.338139 | 0.219977  |
| C           | -2.967997 | 1.745282  | 1.858558  |
| H           | -2.836173 | 1.120444  | 2.752510  |
| C           | -1.704483 | 1.692425  | 0.984535  |
| H           | -0.833804 | 2.026418  | 1.569924  |
| H           | -1.790008 | 2.390361  | 0.142176  |
| H           | -3.828848 | 1.330927  | 1.322525  |
| C           | -1.866646 | -1.645060 | 2.300627  |
| C           | -0.757377 | -1.011203 | 2.733072  |
| H           | -1.826208 | -2.673332 | 1.956677  |
| H           | -2.848688 | -1.188089 | 2.378489  |
| H           | -0.802566 | -0.014439 | 3.164614  |
| H           | 0.211157  | -1.499921 | 2.737064  |
| 72          |           |           |           |
| <b>1TSr</b> |           |           |           |
| Ti          | -0.983267 | -0.379618 | 0.133421  |
| O           | 0.763522  | -0.120703 | -0.182794 |
| C           | -2.613567 | -0.097158 | -1.611782 |
| C           | -3.393445 | -0.531338 | -0.488804 |

|   |           |           |           |
|---|-----------|-----------|-----------|
| C | -3.283395 | 0.452295  | 0.528836  |
| C | -2.449636 | 1.513800  | 0.037793  |
| C | -2.033649 | 1.164499  | -1.282770 |
| C | 2.114453  | 0.162213  | -0.157564 |
| C | 3.037241  | -0.912318 | -0.227862 |
| C | 3.930850  | 1.739292  | -0.001664 |
| C | 2.551043  | 1.503837  | -0.045916 |
| C | -2.609367 | -0.683786 | -2.997068 |
| C | -4.288132 | -1.738189 | -0.445621 |
| C | -4.045773 | 0.460188  | 1.824710  |
| C | -2.288620 | 2.868962  | 0.670086  |
| C | 2.591154  | -2.357734 | -0.397428 |
| C | 3.392017  | -3.354239 | 0.460384  |
| C | 2.631699  | -2.765125 | -1.885857 |
| C | 1.605801  | 2.695690  | 0.008693  |
| C | 1.812824  | 3.627293  | -1.203449 |
| C | 1.749515  | 3.487891  | 1.324361  |
| C | 4.400825  | -0.609291 | -0.183584 |
| C | 4.852933  | 0.702183  | -0.069514 |
| C | -1.303026 | 2.041287  | -2.261293 |
| H | 1.553585  | -2.414815 | -0.060833 |
| H | 0.584369  | 2.309977  | -0.038774 |
| C | 0.303043  | -1.674841 | 3.178440  |
| H | 1.219235  | -1.519464 | 2.602445  |
| H | 0.511585  | -1.394843 | 4.217202  |
| H | 0.048765  | -2.737522 | 3.175292  |
| H | -4.991307 | 1.002326  | 1.701614  |
| H | -4.298403 | -0.548746 | 2.160716  |
| H | -3.502814 | 0.958047  | 2.632661  |
| H | -2.977340 | 3.576836  | 0.193032  |
| H | -2.534190 | 2.863410  | 1.734481  |
| H | -1.280300 | 3.273516  | 0.559262  |
| H | -0.846071 | 2.903484  | -1.776449 |
| H | -0.518835 | 1.501500  | -2.799822 |
| H | -2.007684 | 2.422095  | -3.011083 |
| H | -3.216827 | -0.056378 | -3.660555 |
| H | -1.605499 | -0.730467 | -3.429113 |
| H | -3.042068 | -1.685973 | -3.030188 |
| H | -5.275672 | -1.486096 | -0.850958 |
| H | -3.908086 | -2.570331 | -1.044101 |
| H | -4.445743 | -2.100142 | 0.573680  |
| H | 5.123305  | -1.416422 | -0.240711 |
| H | 5.917181  | 0.912670  | -0.036459 |
| H | 4.285984  | 2.761480  | 0.084484  |
| H | 1.707156  | 3.087661  | -2.148951 |
| H | 1.085917  | 4.447026  | -1.190584 |
| H | 2.809864  | 4.077951  | -1.190186 |
| H | 1.023437  | 4.307330  | 1.361844  |
| H | 1.594243  | 2.855465  | 2.204328  |
| H | 2.745541  | 3.931904  | 1.414669  |
| H | 4.429505  | -3.444674 | 0.125603  |
| H | 3.406843  | -3.060930 | 1.514897  |
| H | 2.947179  | -4.352261 | 0.388849  |
| H | 2.038450  | -2.086258 | -2.508044 |
| H | 3.658723  | -2.735937 | -2.263590 |
| H | 2.253307  | -3.783907 | -2.024647 |
| C | -0.827770 | -0.798549 | 2.677621  |
| H | -1.152636 | -1.671537 | 1.413796  |
| C | -0.600027 | 0.515533  | 2.258306  |
| H | 0.422893  | 0.864436  | 2.160340  |

|   |           |           |           |
|---|-----------|-----------|-----------|
| H | -1.348145 | 1.273530  | 2.432253  |
| H | -1.810573 | -1.015677 | 3.098276  |
| C | -0.982651 | -2.471859 | -0.908981 |
| C | -1.087289 | -2.884549 | 0.419195  |
| H | -0.013428 | -2.429767 | -1.390577 |
| H | -1.832110 | -2.574500 | -1.564502 |
| H | -2.032010 | -3.286099 | 0.779613  |
| H | -0.205941 | -3.246604 | 0.942268  |

72

# **1H-T**

|    |           |           |           |
|----|-----------|-----------|-----------|
| C  | 1.835537  | -0.746146 | -1.662416 |
| C  | 2.970581  | -0.098552 | -1.068023 |
| C  | 1.736432  | -2.201834 | -2.027751 |
| H  | 2.088642  | -2.352881 | -3.055653 |
| H  | 0.709597  | -2.572330 | -1.983780 |
| H  | 2.352751  | -2.835715 | -1.385618 |
| C  | 4.292748  | -0.742123 | -0.750275 |
| H  | 4.975639  | -0.620756 | -1.600068 |
| H  | 4.199903  | -1.814679 | -0.569100 |
| H  | 4.781841  | -0.289346 | -1.16558  |
| C  | 1.412987  | 1.523825  | -1.587569 |
| C  | 2.710828  | 1.302883  | -1.036679 |
| C  | 0.784280  | 2.860704  | -1.849357 |
| H  | -0.306562 | 2.812665  | -1.829106 |
| H  | 1.104878  | 3.616316  | -1.128824 |
| H  | 1.074992  | 3.217671  | -2.845513 |
| C  | 3.688035  | 2.374470  | -0.654213 |
| H  | 4.170177  | 2.772400  | -1.555647 |
| H  | 3.205789  | 3.218722  | -0.154015 |
| H  | 4.480923  | 1.998824  | -0.004209 |
| C  | 0.879342  | 0.259221  | -1.995646 |
| Ti | 0.996594  | 0.177799  | 0.332214  |
| C  | 3.582921  | -2.070130 | 2.663853  |
| H  | 3.370476  | -1.370679 | 3.474877  |
| H  | 3.878937  | -3.029404 | 3.108017  |
| H  | 4.451216  | -1.719421 | 2.095691  |
| C  | 2.400307  | -2.301419 | 1.781775  |
| C  | 1.155349  | -1.813239 | 1.976652  |
| H  | 0.917238  | -1.213134 | 2.854207  |
| H  | 0.317673  | -2.202504 | 1.408844  |
| H  | 2.902249  | 0.448361  | 1.817141  |
| H  | 2.553843  | -2.985476 | 0.947433  |
| C  | 1.219703  | 1.871208  | 1.507727  |
| C  | 2.462515  | 1.370202  | 2.253792  |
| H  | 0.326103  | 1.866067  | 2.137348  |
| H  | 2.252108  | 1.127549  | 3.298965  |
| H  | 3.276377  | 2.097429  | 2.219074  |
| H  | 1.343098  | 2.861895  | 1.075043  |
| C  | -0.394645 | 0.058887  | -2.763539 |
| H  | -0.217048 | 0.246725  | -3.829512 |
| H  | -0.773900 | -0.959872 | -2.669490 |
| H  | -1.185712 | 0.737382  | -2.437126 |
| O  | -0.772172 | -0.039802 | 0.424096  |
| C  | -2.131283 | -0.118271 | 0.216914  |
| C  | -2.715075 | -1.368342 | -0.097184 |
| C  | -2.905341 | 1.060836  | 0.343477  |
| C  | -4.102397 | -1.410015 | -0.273460 |
| C  | -4.286218 | 0.952212  | 0.150436  |
| C  | -4.885924 | -0.266643 | -0.153735 |

|   |           |           |           |
|---|-----------|-----------|-----------|
| H | -4.577790 | -2.357439 | -0.506004 |
| H | -4.904394 | 1.838616  | 0.244741  |
| H | -5.960571 | -0.325177 | -0.294696 |
| C | -2.288277 | 2.398177  | 0.731149  |
| H | -1.221993 | 2.351241  | 0.494311  |
| C | -1.907363 | -2.656368 | -0.193169 |
| H | -0.849938 | -2.378523 | -0.264306 |
| C | -2.420166 | 2.628386  | 2.251824  |
| H | -3.473626 | 2.698534  | 2.542115  |
| H | -1.978101 | 1.806059  | 2.824342  |
| H | -1.927071 | 3.560181  | 2.549203  |
| C | -2.872331 | 3.589202  | -0.049935 |
| H | -3.916489 | 3.783368  | 0.213367  |
| H | -2.310490 | 4.499772  | 0.181691  |
| H | -2.827470 | 3.426733  | -1.131773 |
| C | -2.236423 | -3.483941 | -1.450434 |
| H | -1.562416 | -4.343867 | -1.524950 |
| H | -3.256230 | -3.878571 | -1.421501 |
| H | -2.139525 | -2.891641 | -2.365798 |
| C | -2.093697 | -3.512669 | 1.077868  |
| H | -1.467390 | -4.410935 | 1.040895  |
| H | -1.845248 | -2.953506 | 1.985802  |
| H | -3.134710 | -3.836939 | 1.173057  |

58

# **2A**

|    |           |           |           |
|----|-----------|-----------|-----------|
| Ti | 0.914507  | -0.145536 | -0.654783 |
| C  | 2.310509  | 1.264928  | 0.558288  |
| C  | 1.709549  | 0.380504  | 1.510423  |
| N  | -0.855207 | -0.046463 | -0.213485 |
| C  | 2.114949  | -0.944857 | 1.182562  |
| C  | 3.176642  | 0.490861  | -0.298719 |
| C  | 2.200028  | 2.765349  | 0.541341  |
| H  | 1.290371  | 3.116291  | 1.033192  |
| H  | 3.050218  | 3.209511  | 1.073319  |
| H  | 2.213363  | 3.169882  | -0.474903 |
| C  | -2.132125 | -0.024571 | -0.145293 |
| C  | 3.038715  | -0.871600 | 0.075631  |
| C  | -2.832188 | 1.364699  | -0.054966 |
| C  | 4.118590  | 1.051213  | -1.323498 |
| H  | 4.349824  | 0.327971  | -2.108227 |
| H  | 3.720090  | 1.949439  | -1.801572 |
| H  | 5.065541  | 1.330760  | -0.845751 |
| C  | 0.841434  | 0.778228  | 2.668666  |
| H  | 0.084604  | 0.022973  | 2.892864  |
| H  | 1.455581  | 0.904683  | 3.568383  |
| H  | 0.329778  | 1.726108  | 2.489333  |
| C  | -2.870187 | -1.398346 | -0.156315 |
| C  | 1.759153  | -2.199313 | 1.933979  |
| H  | 1.644123  | -3.063872 | 1.273255  |
| H  | 2.553969  | -2.448651 | 2.647466  |
| H  | 0.834121  | -2.084871 | 2.502914  |
| C  | -3.453295 | -1.631288 | -1.577378 |
| H  | -4.266069 | -0.949160 | -1.823352 |
| H  | -2.678538 | -1.538002 | -2.345386 |
| H  | -3.849339 | -2.650338 | -1.627401 |
| C  | -1.872801 | -2.541450 | 0.128714  |
| H  | -1.111773 | -2.627512 | -0.654196 |
| H  | -1.370230 | -2.412160 | 1.091480  |
| H  | -2.414285 | -3.491207 | 0.156309  |

|   |           |           |           |
|---|-----------|-----------|-----------|
| C | -4.145008 | 1.466944  | -0.863421 |
| H | -4.551226 | 2.474280  | -0.731378 |
| H | -3.972485 | 1.323191  | -1.933719 |
| H | -4.914636 | 0.766873  | -0.538100 |
| C | 3.754623  | -2.043782 | -0.534041 |
| H | 3.134127  | -2.944966 | -0.554048 |
| H | 4.084631  | -1.836970 | -1.554125 |
| H | 4.646052  | -2.287912 | 0.056854  |
| C | -3.994264 | -1.493353 | 0.901207  |
| H | -4.790053 | -0.762889 | 0.755826  |
| H | -4.450776 | -2.485440 | 0.833492  |
| H | -3.601962 | -1.381715 | 1.916354  |
| C | -1.885946 | 2.467338  | -0.577012 |
| H | -2.397461 | 3.432669  | -0.526817 |
| H | -0.975352 | 2.543176  | 0.021637  |
| H | -1.603788 | 2.294177  | -1.620786 |
| C | -3.117662 | 1.650455  | 1.446061  |
| H | -3.504104 | 2.670222  | 1.538980  |
| H | -3.860432 | 0.975483  | 1.872057  |
| H | -2.204260 | 1.581640  | 2.044188  |
| C | 1.289424  | -0.071147 | -2.673164 |
| H | 1.279629  | 0.988669  | -2.975339 |
| H | 2.187339  | -0.532457 | -3.091734 |
| H | 0.399877  | -0.547707 | -3.119843 |

64

**2B**

|    |           |           |           |
|----|-----------|-----------|-----------|
| Ti | -0.890338 | -0.050693 | -0.599339 |
| C  | -2.255980 | -0.856873 | 1.221564  |
| C  | -1.461200 | 0.225616  | 1.699485  |
| N  | 0.886368  | -0.014206 | -0.137325 |
| C  | -1.851540 | 1.405390  | 0.988200  |
| C  | -3.145879 | -0.345000 | 0.220220  |
| C  | -2.247732 | -2.252746 | 1.782490  |
| H  | -1.239518 | -2.589122 | 2.040665  |
| H  | -2.841776 | -2.289713 | 2.703560  |
| H  | -2.680878 | -2.981904 | 1.094231  |
| C  | 2.162306  | 0.013873  | -0.031718 |
| C  | -2.893812 | 1.053319  | 0.073169  |
| C  | 2.902895  | -1.315320 | 0.323447  |
| C  | -4.269507 | -1.081402 | -0.455983 |
| H  | -4.304805 | -0.895459 | -1.534425 |
| H  | -4.216537 | -2.159897 | -0.293565 |
| H  | -5.229756 | -0.745239 | -0.046874 |
| C  | -0.484217 | 0.165623  | 2.837695  |
| H  | 0.335457  | 0.875836  | 2.708880  |
| H  | -0.987925 | 0.410465  | 3.780673  |
| H  | -0.050713 | -0.830925 | 2.949810  |
| C  | 2.900066  | 1.362850  | -0.312171 |
| C  | -1.394192 | 2.807402  | 1.268087  |
| H  | -1.259926 | 3.392231  | 0.354297  |
| H  | -2.149249 | 3.323692  | 1.873953  |
| H  | -0.457483 | 2.829405  | 1.825506  |
| C  | 3.242490  | 1.371393  | -1.829440 |
| H  | 3.959051  | 0.596809  | -2.106836 |
| H  | 2.341384  | 1.246349  | -2.437135 |
| H  | 3.685974  | 2.339343  | -2.083388 |
| C  | 1.963797  | 2.554272  | -0.030965 |
| H  | 1.058915  | 2.518319  | -0.637960 |
| H  | 1.675100  | 2.588994  | 1.023438  |

|   |           |           |           |
|---|-----------|-----------|-----------|
| H | 2.489688  | 3.485217  | -0.261852 |
| C | 4.091376  | -1.621716 | -0.617859 |
| H | 4.544108  | -2.569815 | -0.311415 |
| H | 3.761003  | -1.737190 | -1.654906 |
| H | 4.876673  | -0.867061 | -0.591663 |
| C | -3.718503 | 2.012659  | -0.733937 |
| H | -3.141333 | 2.883293  | -1.052940 |
| H | -4.139240 | 1.544084  | -1.626994 |
| H | -4.558453 | 2.380721  | -0.131652 |
| C | 4.187188  | 1.604077  | 0.507199  |
| H | 4.959630  | 0.850856  | 0.353894  |
| H | 4.612317  | 2.563680  | 0.197650  |
| H | 3.977386  | 1.675089  | 1.578026  |
| C | 1.938944  | -2.514968 | 0.238598  |
| H | 2.474459  | -3.425506 | 0.521812  |
| H | 1.087260  | -2.401838 | 0.913976  |
| H | 1.564978  | -2.659043 | -0.779153 |
| C | 3.393365  | -1.230158 | 1.795903  |
| H | 3.780224  | -2.210759 | 2.090629  |
| H | 4.192431  | -0.505554 | 1.941705  |
| H | 2.571563  | -0.979734 | 2.473954  |
| C | -1.047954 | 1.170859  | -2.276651 |
| H | -0.197690 | 0.937913  | -2.933213 |
| H | -1.979760 | 1.004549  | -2.831783 |
| H | -0.992899 | 2.236793  | -2.028325 |
| C | -0.695919 | -1.908741 | -2.551693 |
| C | -1.332326 | -2.550212 | -1.555120 |
| H | -1.235729 | -1.500738 | -3.400660 |
| H | 0.387330  | -1.823821 | -2.577313 |
| H | -2.405806 | -2.700394 | -1.580749 |
| H | -0.784588 | -3.016428 | -0.740229 |

66

**2TS(B-C)**

|    |           |           |           |
|----|-----------|-----------|-----------|
| Ti | -0.902470 | -0.178456 | 0.546456  |
| C  | -2.264252 | 1.334208  | -0.735587 |
| C  | -1.464830 | 0.566071  | -1.641467 |
| N  | 0.892574  | -0.045555 | 0.154230  |
| C  | -1.841736 | -0.803932 | -1.509424 |
| C  | -3.172046 | 0.438218  | -0.082273 |
| C  | -2.268225 | 2.833209  | -0.625416 |
| H  | -1.283111 | 3.261292  | -0.826420 |
| H  | -2.964327 | 3.265074  | -1.354814 |
| H  | -2.584519 | 3.175817  | 0.362918  |
| C  | 2.168745  | -0.010117 | 0.043627  |
| C  | -2.902528 | -0.880211 | -0.543877 |
| C  | 2.886707  | 1.377550  | 0.012187  |
| C  | -4.286845 | 0.821445  | 0.849565  |
| H  | -4.402658 | 0.116390  | 1.678522  |
| H  | -4.151890 | 1.821115  | 1.268268  |
| H  | -5.239039 | 0.831377  | 0.305308  |
| C  | -0.499258 | 1.115746  | -2.650573 |
| H  | 0.322114  | 0.423445  | -2.848407 |
| H  | -1.014220 | 1.295044  | -3.602289 |
| H  | -0.070219 | 2.067370  | -2.330020 |
| C  | 2.936081  | -1.372755 | -0.024271 |
| C  | -1.354150 | -1.945968 | -2.358050 |
| H  | -1.296568 | -2.885867 | -1.801827 |
| H  | -2.043268 | -2.110129 | -3.195631 |
| H  | -0.368466 | -1.746477 | -2.782711 |

|   |           |           |           |
|---|-----------|-----------|-----------|
| C | 3.393840  | -1.726172 | 1.418104  |
| H | 4.148783  | -1.041626 | 1.805705  |
| H | 2.545713  | -1.732698 | 2.110455  |
| H | 3.828169  | -2.730950 | 1.413274  |
| C | 1.997968  | -2.497772 | -0.508386 |
| H | 1.180976  | -2.683906 | 0.189763  |
| H | 1.570435  | -2.270787 | -1.488546 |
| H | 2.570401  | -3.425386 | -0.598713 |
| C | 4.136343  | 1.445026  | 0.922538  |
| H | 4.555571  | 2.453801  | 0.857479  |
| H | 3.878693  | 1.267071  | 1.970946  |
| H | 4.927224  | 0.751159  | 0.639803  |
| C | -3.692112 | -2.113977 | -0.205444 |
| H | -3.080891 | -3.020343 | -0.236846 |
| H | -4.152003 | -2.051189 | 0.784454  |
| H | -4.504871 | -2.250609 | -0.929022 |
| C | 4.157505  | -1.380299 | -0.972677 |
| H | 4.927587  | -0.656124 | -0.710100 |
| H | 4.620667  | -2.370599 | -0.925749 |
| H | 3.860856  | -1.210499 | -2.011610 |
| C | 1.933682  | 2.491103  | 0.489222  |
| H | 2.441370  | 3.456331  | 0.407349  |
| H | 1.020492  | 2.537171  | -0.106860 |
| H | 1.659759  | 2.354084  | 1.539589  |
| C | 3.285424  | 1.700334  | -1.454761 |
| H | 3.685306  | 2.718684  | -1.489373 |
| H | 4.051794  | 1.033939  | -1.848064 |
| H | 2.418592  | 1.660756  | -2.120106 |
| C | -1.064757 | -1.802313 | 1.925696  |
| H | -0.308070 | -2.261342 | 2.559602  |
| H | -2.059432 | -2.144263 | 2.212369  |
| H | -0.861759 | -2.193247 | 0.888901  |
| C | -0.942477 | 0.082259  | 3.025862  |
| C | -1.155123 | 1.232986  | 2.254676  |
| H | -1.743917 | -0.325773 | 3.631560  |
| H | 0.058695  | -0.146294 | 3.374967  |
| H | -2.142805 | 1.678381  | 2.249401  |
| H | -0.322585 | 1.906899  | 2.079197  |

64

**2C**

|    |           |           |           |
|----|-----------|-----------|-----------|
| Ti | 0.899544  | -0.292707 | -0.360904 |
| C  | 2.812454  | 1.123034  | -0.301861 |
| C  | 1.757431  | 1.699487  | 0.489944  |
| N  | -0.905319 | -0.076553 | -0.083940 |
| C  | 1.514637  | 0.838716  | 1.606813  |
| C  | 3.195206  | -0.101166 | 0.314143  |
| C  | 3.484605  | 1.781939  | -1.471344 |
| H  | 2.785104  | 2.372546  | -2.068223 |
| H  | 4.268294  | 2.463696  | -1.118627 |
| H  | 3.960679  | 1.055506  | -2.133594 |
| C  | -2.180678 | -0.008167 | -0.042025 |
| C  | 2.376668  | -0.289982 | 1.479196  |
| C  | -2.875812 | 1.263199  | -0.626098 |
| C  | 4.309057  | -1.002289 | -0.137097 |
| H  | 4.163299  | -2.036204 | 0.185991  |
| H  | 4.428900  | -0.998018 | -1.223534 |
| H  | 5.260401  | -0.665862 | 0.293313  |
| C  | 1.180175  | 3.072029  | 0.286934  |
| H  | 0.206280  | 3.182971  | 0.767018  |

|   |           |           |           |
|---|-----------|-----------|-----------|
| H | 1.848903  | 3.822934  | 0.725881  |
| H | 1.068909  | 3.322492  | -0.771339 |
| C | -2.944514 | -1.204409 | 0.612716  |
| C | 0.580720  | 1.115426  | 2.750047  |
| H | 0.243158  | 0.196269  | 3.234896  |
| H | 1.089134  | 1.717057  | 3.513251  |
| H | -0.303791 | 1.670610  | 2.430778  |
| C | -3.607362 | -2.065417 | -0.495292 |
| H | -4.425656 | -1.556933 | -1.002871 |
| H | -2.875761 | -2.377116 | -1.248392 |
| H | -4.015324 | -2.971893 | -0.037088 |
| C | -1.960165 | -2.113558 | 1.377954  |
| H | -1.237321 | -2.588600 | 0.709692  |
| H | -1.411318 | -1.560245 | 2.145658  |
| H | -2.521167 | -2.910937 | 1.873688  |
| C | -4.234257 | 0.996629  | -1.313252 |
| H | -4.624049 | 1.951186  | -1.679697 |
| H | -4.126904 | 0.337512  | -2.179182 |
| H | -4.990476 | 0.577973  | -0.649380 |
| C | 2.477932  | -1.433100 | 2.454261  |
| H | 1.517098  | -1.661911 | 2.923359  |
| H | 2.849474  | -2.347327 | 1.984029  |
| H | 3.177426  | -1.180849 | 3.260398  |
| C | -4.010565 | -0.733685 | 1.631304  |
| H | -4.797842 | -0.123910 | 1.188898  |
| H | -4.490615 | -1.616535 | 2.064544  |
| H | -3.557488 | -0.170541 | 2.452768  |
| C | -1.962240 | 1.918202  | -1.684513 |
| H | -2.461946 | 2.800545  | -2.094642 |
| H | -1.009640 | 2.239536  | -1.262381 |
| H | -1.759987 | 1.233606  | -2.514538 |
| C | -3.075298 | 2.272952  | 0.536549  |
| H | -3.469688 | 3.208778  | 0.128139  |
| H | -3.780176 | 1.917224  | 1.289353  |
| H | -2.126909 | 2.498388  | 1.033052  |
| C | 1.212568  | -2.904354 | -1.168325 |
| H | 0.694690  | -3.866415 | -1.134838 |
| H | 2.281641  | -3.084725 | -1.304786 |
| H | 1.090667  | -2.520307 | -0.128206 |
| C | 0.647386  | -2.003553 | -2.291822 |
| C | 1.319658  | -0.609802 | -2.346425 |
| H | 0.804736  | -2.527703 | -3.242626 |
| H | -0.440417 | -1.916271 | -2.183532 |
| H | 2.357311  | -0.671500 | -2.679722 |
| H | 0.771980  | 0.087619  | -2.990888 |

64

**2D**

|    |           |           |           |
|----|-----------|-----------|-----------|
| Ti | -0.886893 | 0.231233  | -0.331968 |
| C  | -2.868598 | -1.089615 | -0.489241 |
| C  | -1.836600 | -1.807656 | 0.215592  |
| N  | 0.922674  | 0.034220  | -0.095661 |
| C  | -1.576943 | -1.119675 | 1.443329  |
| C  | -3.218586 | 0.046445  | 0.286465  |
| C  | -3.523314 | -1.535549 | -1.765903 |
| H  | -2.820232 | -2.032463 | -2.439908 |
| H  | -4.322109 | -2.254901 | -1.547208 |
| H  | -3.975767 | -0.701675 | -2.307179 |
| C  | 2.198583  | -0.043291 | -0.048954 |
| C  | -2.394401 | 0.051870  | 1.466884  |

|   |           |           |           |
|---|-----------|-----------|-----------|
| C | 2.883647  | -1.205550 | -0.835451 |
| C | -4.308858 | 1.028690  | -0.029862 |
| H | -4.147074 | 1.995616  | 0.452513  |
| H | -4.416090 | 1.195693  | -1.104989 |
| H | -5.271497 | 0.648835  | 0.333748  |
| C | -1.290492 | -3.150756 | -0.185922 |
| H | -0.323483 | -3.356050 | 0.277296  |
| H | -1.979546 | -3.943717 | 0.129952  |
| H | -1.173402 | -3.243175 | -1.269286 |
| C | 2.960737  | 1.011593  | 0.811874  |
| C | -0.662600 | -1.583476 | 2.541647  |
| H | -0.271882 | -0.749999 | 3.130122  |
| H | -1.208407 | -2.239626 | 3.230523  |
| H | 0.187443  | -2.149938 | 2.155495  |
| C | 3.669052  | 2.028211  | -0.123991 |
| H | 4.501907  | 1.595081  | -0.675806 |
| H | 2.968515  | 2.464528  | -0.843418 |
| H | 4.066030  | 2.845273  | 0.486428  |
| C | 1.968919  | 1.802256  | 1.690193  |
| H | 1.271592  | 2.392348  | 1.090130  |
| H | 1.390819  | 1.140837  | 2.341996  |
| H | 2.528093  | 2.496035  | 2.324494  |
| C | 4.257550  | -0.852361 | -1.447816 |
| H | 4.636980  | -1.736250 | -1.969475 |
| H | 4.178029  | -0.049812 | -2.186247 |
| H | 5.008378  | -0.572034 | -0.708905 |
| C | -2.491509 | 1.035913  | 2.603038  |
| H | -1.545387 | 1.140562  | 3.140112  |
| H | -2.796172 | 2.029625  | 2.264918  |
| H | -3.240222 | 0.698842  | 3.330025  |
| C | 3.993056  | 0.356935  | 1.761239  |
| H | 4.779334  | -0.188900 | 1.240094  |
| H | 4.478495  | 1.146338  | 2.343200  |
| H | 3.509727  | -0.323155 | 2.469176  |
| C | 1.973741  | -1.658517 | -1.998539 |
| H | 2.472986  | -2.456348 | -2.555748 |
| H | 1.018890  | -2.050993 | -1.643490 |
| H | 1.775731  | -0.838000 | -2.695827 |
| C | 3.046078  | -2.401121 | 0.142985  |
| H | 3.426545  | -3.263135 | -0.413946 |
| H | 3.747553  | -2.193625 | 0.952338  |
| H | 2.085603  | -2.684403 | 0.583590  |
| C | -0.295306 | 3.630430  | -1.459941 |
| H | -0.255684 | 4.421331  | -0.705413 |
| H | 0.707615  | 3.208178  | -1.571507 |
| H | -0.577503 | 4.083002  | -2.414473 |
| C | -1.313585 | 2.545730  | -1.089136 |
| C | -1.370617 | 1.330109  | -1.999935 |
| H | -1.037052 | 2.240737  | -0.015814 |
| H | -2.311174 | 2.968306  | -0.946497 |
| H | -2.305246 | 1.206416  | -2.542466 |
| H | -0.509137 | 1.260266  | -2.676951 |

70

## 2E-fsi

|    |           |           |           |
|----|-----------|-----------|-----------|
| Ti | 0.876948  | 0.205516  | -0.257434 |
| C  | 2.111561  | -0.478372 | 1.686137  |
| C  | 1.331049  | -1.592989 | 1.227076  |
| N  | -0.925304 | -0.167435 | -0.123161 |
| C  | 1.816278  | -1.968832 | -0.058710 |

|   |           |           |           |
|---|-----------|-----------|-----------|
| C | 3.087030  | -0.181307 | 0.689948  |
| C | 2.030615  | 0.153101  | 3.046494  |
| H | 1.010507  | 0.176258  | 3.435380  |
| H | 2.637332  | -0.419696 | 3.758793  |
| H | 2.412631  | 1.176227  | 3.046252  |
| C | -2.196937 | -0.219246 | 0.010471  |
| C | 2.902428  | -1.101279 | -0.391672 |
| C | -2.850488 | 0.229253  | 1.355727  |
| C | 4.194166  | 0.825659  | 0.814311  |
| H | 4.516278  | 1.210379  | -0.157164 |
| H | 3.903939  | 1.679081  | 1.430928  |
| H | 5.071240  | 0.366147  | 1.286407  |
| C | 0.332019  | -2.377518 | 2.027335  |
| H | -0.522567 | -2.692138 | 1.423124  |
| H | 0.806678  | -3.284686 | 2.420875  |
| H | -0.043929 | -1.815321 | 2.883466  |
| C | -3.027259 | -0.668494 | -1.244410 |
| C | 1.358571  | -3.157822 | -0.857394 |
| H | 1.524628  | -3.026802 | -1.930480 |
| H | 1.916795  | -4.053438 | -0.556997 |
| H | 0.297850  | -3.368964 | -0.704919 |
| C | -3.241177 | 0.591565  | -2.125329 |
| H | -3.893566 | 1.325327  | -1.647414 |
| H | -2.292780 | 1.085789  | -2.355021 |
| H | -3.709196 | 0.295671  | -3.069540 |
| C | -2.224317 | -1.715399 | -2.047973 |
| H | -1.260110 | -1.334019 | -2.380199 |
| H | -2.045912 | -2.616169 | -1.452193 |
| H | -2.797118 | -2.009731 | -2.932209 |
| C | -3.899078 | 1.345093  | 1.115957  |
| H | -4.301105 | 1.656913  | 2.084909  |
| H | -3.444664 | 2.225211  | 0.650392  |
| H | -4.742849 | 1.030095  | 0.502647  |
| C | 3.833375  | -1.294198 | -1.558246 |
| H | 3.311479  | -1.549180 | -2.485732 |
| H | 4.456502  | -0.415888 | -1.742859 |
| H | 4.516860  | -2.125446 | -1.346389 |
| C | -4.402004 | -1.312136 | -0.955717 |
| H | -5.092729 | -0.663719 | -0.417533 |
| H | -4.870966 | -1.547995 | -1.916105 |
| H | -4.304150 | -2.252108 | -0.406937 |
| C | -1.791020 | 0.806103  | 2.312992  |
| H | -2.283361 | 1.127488  | 3.235321  |
| H | -1.040374 | 0.061028  | 2.576804  |
| H | -1.278968 | 1.671160  | 1.887445  |
| C | -3.507634 | -0.979529 | 2.074814  |
| H | -3.811017 | -0.661994 | 3.077225  |
| H | -4.395652 | -1.354047 | 1.570103  |
| H | -2.801050 | -1.806856 | 2.192253  |
| C | 1.139867  | 2.206913  | 0.274837  |
| C | 0.050181  | 3.103199  | -0.345447 |
| H | -0.153348 | 2.828366  | -1.391960 |
| H | -0.897733 | 2.945031  | 0.180239  |
| C | 0.409365  | 4.598622  | -0.301274 |
| H | 1.329366  | 4.802377  | -0.860185 |
| H | -0.389330 | 5.210072  | -0.733956 |
| H | 0.568906  | 4.929719  | 0.729768  |
| C | 0.813393  | 0.335748  | -2.921210 |
| C | 1.837733  | 1.178829  | -2.699183 |
| H | 0.975681  | -0.731125 | -3.059562 |

|   |           |          |           |
|---|-----------|----------|-----------|
| H | -0.197642 | 0.699418 | -3.071209 |
| H | 1.681362  | 2.250766 | -2.632139 |
| H | 2.862073  | 0.829800 | -2.640082 |
| H | 1.172691  | 2.337126 | 1.363421  |
| H | 2.135309  | 2.498787 | -0.096488 |

70

**2TS(E-F)-fsi**

|    |           |           |           |
|----|-----------|-----------|-----------|
| Ti | -0.902470 | -0.178456 | 0.546456  |
| C  | -2.264252 | 1.334208  | -0.735587 |
| C  | -1.464830 | 0.566071  | -1.641467 |
| N  | 0.892574  | -0.045555 | 0.154230  |
| C  | -1.841736 | -0.803932 | -1.509424 |
| C  | -3.172046 | 0.438218  | -0.082273 |
| C  | -2.268225 | 2.833209  | -0.625416 |
| H  | -1.283111 | 3.261292  | -0.826420 |
| H  | -2.964327 | 3.265074  | -1.354814 |
| H  | -2.584519 | 3.175817  | 0.362918  |
| C  | 2.168745  | -0.010117 | 0.043627  |
| C  | -2.902528 | -0.880211 | -0.543877 |
| C  | 2.886707  | 1.377550  | 0.012187  |
| C  | -4.286845 | 0.821445  | 0.849565  |
| H  | -4.402658 | 0.116390  | 1.678522  |
| H  | -4.151890 | 1.821115  | 1.268268  |
| H  | -5.239039 | 0.831377  | 0.305308  |
| C  | -0.499258 | 1.115746  | -2.650573 |
| H  | 0.322114  | 0.423445  | -2.848407 |
| H  | -1.014220 | 1.295044  | -3.602289 |
| H  | -0.070219 | 2.067370  | -2.330020 |
| C  | 2.936081  | -1.372755 | -0.024271 |
| C  | -1.354150 | -1.945968 | -2.358050 |
| H  | -1.296568 | -2.885867 | -1.801827 |
| H  | -2.043268 | -2.110129 | -3.195631 |
| H  | -0.368466 | -1.746477 | -2.782711 |
| C  | 3.393840  | -1.726172 | 1.418104  |
| H  | 4.148783  | -1.041626 | 1.805705  |
| H  | 2.545713  | -1.732698 | 2.110455  |
| H  | 3.828169  | -2.730950 | 1.413274  |
| C  | 1.997968  | -2.497772 | -0.508386 |
| H  | 1.180976  | -2.683906 | 0.189763  |
| H  | 1.570435  | -2.270787 | -1.488546 |
| H  | 2.570401  | -3.425386 | -0.598713 |
| C  | 4.136343  | 1.445026  | 0.922538  |
| H  | 4.555571  | 2.453801  | 0.857479  |
| H  | 3.878693  | 1.267071  | 1.970946  |
| H  | 4.927224  | 0.751159  | 0.639803  |
| C  | -3.692112 | -2.113977 | -0.205444 |
| H  | -3.080891 | -3.020343 | -0.236846 |
| H  | -4.152003 | -2.051189 | 0.784454  |
| H  | -4.504871 | -2.250609 | -0.929022 |
| C  | 4.157505  | -1.380299 | -0.972677 |
| H  | 4.927587  | -0.656124 | -0.710100 |
| H  | 4.620667  | -2.370599 | -0.925749 |
| H  | 3.860856  | -1.210499 | -2.011610 |
| C  | 1.933682  | 2.491103  | 0.489222  |
| H  | 2.441370  | 3.456331  | 0.407349  |
| H  | 1.020492  | 2.537171  | -0.106860 |
| H  | 1.659759  | 2.354084  | 1.539589  |
| C  | 3.285424  | 1.700334  | -1.454761 |
| H  | 3.685306  | 2.718684  | -1.489373 |

|   |           |           |           |
|---|-----------|-----------|-----------|
| H | 4.051794  | 1.033939  | -1.848064 |
| H | 2.418592  | 1.660756  | -2.120106 |
| C | -1.064757 | -1.802313 | 1.925696  |
| H | -0.308070 | -2.261342 | 2.559602  |
| H | -2.059432 | -2.144263 | 2.212369  |
| H | -0.861759 | -2.193247 | 0.888901  |
| C | -0.942477 | 0.082259  | 3.025862  |
| C | -1.155123 | 1.232986  | 2.254676  |
| H | -1.743917 | -0.325773 | 3.631560  |
| H | 0.058695  | -0.146294 | 3.374967  |
| H | -2.142805 | 1.678381  | 2.249401  |
| H | -0.322585 | 1.906899  | 2.079197  |

70

**2F-fsi**

|    |           |           |           |
|----|-----------|-----------|-----------|
| Ti | 0.841091  | -0.099263 | -0.211029 |
| C  | 1.902885  | -1.099049 | 1.638411  |
| C  | 1.090105  | -2.099235 | 1.032407  |
| N  | -0.984152 | -0.168689 | -0.009882 |
| C  | 1.594078  | -2.330137 | -0.289567 |
| C  | 2.931742  | -0.735311 | 0.705760  |
| C  | 1.761530  | -0.569995 | 3.040383  |
| H  | 0.733864  | -0.643934 | 3.404214  |
| H  | 2.391365  | -1.146696 | 3.728729  |
| H  | 2.073947  | 0.475021  | 3.124180  |
| C  | -2.257772 | -0.059914 | 0.002180  |
| C  | 2.750270  | -1.505925 | -0.481875 |
| C  | -2.893351 | 0.832916  | 1.116298  |
| C  | 4.072967  | 0.205358  | 0.978246  |
| H  | 4.432543  | 0.693545  | 0.068527  |
| H  | 3.807744  | 0.982340  | 1.700035  |
| H  | 4.920185  | -0.348139 | 1.401685  |
| C  | -0.029305 | -2.847064 | 1.696465  |
| H  | -0.779486 | -3.182507 | 0.977883  |
| H  | 0.362884  | -3.737682 | 2.202156  |
| H  | -0.535228 | -2.240087 | 2.450802  |
| C  | -3.080010 | -0.785796 | -1.108694 |
| C  | 1.116562  | -3.374696 | -1.258265 |
| H  | 1.153755  | -3.024297 | -2.293582 |
| H  | 1.760268  | -4.260800 | -1.194349 |
| H  | 0.096376  | -3.696063 | -1.045989 |
| C  | -3.301606 | 0.244324  | -2.252274 |
| H  | -3.935258 | 1.080752  | -1.955444 |
| H  | -2.348381 | 0.642430  | -2.614345 |
| H  | -3.791578 | -0.261929 | -3.089997 |
| C  | -2.273685 | -1.963269 | -1.690556 |
| H  | -1.324926 | -1.640002 | -2.122837 |
| H  | -2.067295 | -2.718310 | -0.926685 |
| H  | -2.857629 | -2.441596 | -2.482169 |
| C  | -3.964455 | 1.814330  | 0.587634  |
| H  | -4.349269 | 2.397485  | 1.429964  |
| H  | -3.540250 | 2.520895  | -0.132305 |
| H  | -4.817646 | 1.321082  | 0.122497  |
| C  | 3.689685  | -1.580395 | -1.649587 |
| H  | 3.164845  | -1.785201 | -2.585882 |
| H  | 4.261085  | -0.657973 | -1.778200 |
| H  | 4.413363  | -2.390526 | -1.496350 |
| C  | -4.441614 | -1.352812 | -0.649315 |
| H  | -5.129043 | -0.596142 | -0.271464 |
| H  | -4.925940 | -1.823385 | -1.510371 |



|   |           |           |           |
|---|-----------|-----------|-----------|
| H | -4.319435 | -2.124675 | 0.115776  |
| C | -1.807875 | 1.676137  | 1.815677  |
| H | -2.276476 | 2.297030  | 2.584618  |
| H | -1.055036 | 1.052607  | 2.304878  |
| H | -1.301811 | 2.344251  | 1.112710  |
| C | -3.512251 | -0.103075 | 2.191567  |
| H | -3.831543 | 0.506889  | 3.042511  |
| H | -4.383210 | -0.650210 | 1.833517  |
| H | -2.776750 | -0.826262 | 2.558051  |
| C | 1.533313  | 2.551908  | -0.250498 |
| C | 1.167716  | 3.981012  | 0.197244  |
| H | 0.075891  | 4.075865  | 0.245549  |
| H | 1.536647  | 4.131587  | 1.218057  |
| C | 1.745943  | 5.071431  | -0.712744 |
| H | 1.346188  | 5.019655  | -1.729899 |
| H | 1.500396  | 6.061055  | -0.317526 |
| H | 2.837284  | 5.000341  | -0.773577 |
| C | 1.324568  | 0.691669  | -2.045222 |
| C | 0.879830  | 2.104250  | -1.581765 |
| H | 2.364747  | 0.686765  | -2.376097 |
| H | 0.688934  | 0.307524  | -2.850898 |
| H | -0.212091 | 2.172979  | -1.492946 |
| H | 1.159492  | 2.834250  | -2.350511 |
| H | 1.243558  | 1.900294  | 0.616795  |
| H | 2.622354  | 2.456404  | -0.331359 |

70

#### 2E-bsi

|    |           |           |           |
|----|-----------|-----------|-----------|
| Ti | -0.874641 | 0.089056  | -0.485238 |
| C  | -1.935890 | -1.635054 | 0.867278  |
| C  | -1.271227 | -0.722097 | 1.740420  |
| N  | 0.954571  | -0.076551 | -0.177067 |
| C  | -1.902024 | 0.551514  | 1.611682  |
| C  | -3.011790 | -0.926612 | 0.226891  |
| C  | -1.716540 | -3.122978 | 0.856718  |
| H  | -0.657853 | -3.387442 | 0.924286  |
| H  | -2.214544 | -3.575703 | 1.722877  |
| H  | -2.127263 | -3.602528 | -0.033557 |
| C  | 2.224444  | -0.095060 | -0.000541 |
| C  | -2.990812 | 0.415400  | 0.678525  |
| C  | 3.016679  | -1.415685 | -0.277696 |
| C  | -4.097582 | -1.503126 | -0.638476 |
| H  | -4.212779 | -0.963498 | -1.584256 |
| H  | -3.935076 | -2.559005 | -0.862238 |
| H  | -5.058966 | -1.432716 | -0.115535 |
| C  | -0.203549 | -1.084128 | 2.730723  |
| H  | 0.462091  | -0.245012 | 2.942810  |
| H  | -0.660523 | -1.387799 | 3.680776  |
| H  | 0.407036  | -1.919550 | 2.381634  |
| C  | 2.945797  | 1.229787  | 0.433002  |
| C  | -1.644588 | 1.746829  | 2.487302  |
| H  | -1.877777 | 2.689910  | 1.987284  |
| H  | -2.277107 | 1.691428  | 3.381869  |
| H  | -0.607670 | 1.793365  | 2.824886  |
| C  | 3.310746  | 1.986579  | -0.874424 |
| H  | 4.075801  | 1.471362  | -1.457289 |
| H  | 2.432441  | 2.125664  | -1.510204 |
| H  | 3.701477  | 2.975907  | -0.615793 |
| C  | 1.997436  | 2.118171  | 1.262503  |
| H  | 1.108673  | 2.410695  | 0.707263  |

|   |           |           |           |
|---|-----------|-----------|-----------|
| H | 1.683491  | 1.611721  | 2.180054  |
| H | 2.523851  | 3.032039  | 1.552585  |
| C | 4.202910  | -1.203215 | -1.249850 |
| H | 4.685913  | -2.169518 | -1.425369 |
| H | 3.861050  | -0.827195 | -2.219234 |
| H | 4.967667  | -0.526436 | -0.870633 |
| C | -4.065091 | 1.426935  | 0.389111  |
| H | -3.834313 | 2.405690  | 0.813119  |
| H | -4.250170 | 1.553431  | -0.682496 |
| H | -5.010759 | 1.100079  | 0.838673  |
| C | 4.224258  | 1.060588  | 1.285770  |
| H | 5.012944  | 0.488217  | 0.799182  |
| H | 4.631697  | 2.057071  | 1.482397  |
| H | 4.008582  | 0.604345  | 2.255528  |
| C | 2.102484  | -2.474322 | -0.916902 |
| H | 2.676660  | -3.389517 | -1.086651 |
| H | 1.262197  | -2.722025 | -0.264587 |
| H | 1.717298  | -2.143111 | -1.883966 |
| C | 3.523091  | -2.015133 | 1.063565  |
| H | 3.915691  | -3.017746 | 0.867229  |
| H | 4.321048  | -1.437889 | 1.524974  |
| H | 2.708638  | -2.116313 | 1.787635  |
| C | -1.467842 | 1.473055  | -1.959929 |
| H | -0.793382 | 1.533480  | -2.817665 |
| H | -2.500549 | 1.403620  | -2.306468 |
| C | -1.204825 | 2.581936  | -0.959462 |
| H | -2.139510 | 2.980534  | -0.561416 |
| H | -0.696656 | 2.169719  | -0.037102 |
| C | -0.307676 | 3.719063  | -1.467693 |
| H | -0.819668 | 4.255138  | -2.271921 |
| H | -0.074772 | 4.435994  | -0.674781 |
| H | 0.634285  | 3.336586  | -1.869951 |
| C | -1.127554 | -2.039419 | -2.163554 |
| H | -0.419036 | -2.619740 | -1.587789 |
| H | -2.158248 | -2.371134 | -2.162455 |
| C | -0.733161 | -1.043436 | -2.978322 |
| H | -1.429698 | -0.553166 | -3.648233 |
| H | 0.311710  | -0.759897 | -3.070609 |

70

#### 2TS(E-F)-bsi

|    |           |           |           |
|----|-----------|-----------|-----------|
| Ti | -0.912111 | 0.107958  | -0.472074 |
| C  | -1.894056 | -1.813471 | 0.592099  |
| C  | -1.189435 | -1.074636 | 1.593317  |
| N  | 0.922404  | -0.054241 | -0.178608 |
| C  | -1.821915 | 0.196690  | 1.733108  |
| C  | -2.992934 | -1.008853 | 0.147235  |
| C  | -1.658816 | -3.252324 | 0.230406  |
| H  | -0.619455 | -3.549170 | 0.386442  |
| H  | -2.279226 | -3.904330 | 0.857455  |
| H  | -1.914153 | -3.467366 | -0.809958 |
| C  | 2.195886  | -0.101528 | -0.027217 |
| C  | -2.946120 | 0.228652  | 0.841704  |
| C  | 2.987655  | -1.372481 | -0.488487 |
| C  | -4.098243 | -1.431283 | -0.778621 |
| H  | -4.358529 | -0.655405 | -1.506017 |
| H  | -3.854131 | -2.343635 | -1.326174 |
| H  | -5.006196 | -1.639689 | -0.199302 |
| C  | -0.088522 | -1.602342 | 2.464569  |
| H  | 0.639416  | -0.830088 | 2.722565  |

|   |           |           |           |
|---|-----------|-----------|-----------|
| H | -0.506754 | -1.986706 | 3.402893  |
| H | 0.446427  | -2.424645 | 1.986602  |
| C | 2.931985  | 1.150192  | 0.573503  |
| C | -1.515030 | 1.223537  | 2.787929  |
| H | -1.690291 | 2.246466  | 2.442981  |
| H | -2.159670 | 1.065704  | 3.661286  |
| H | -0.481466 | 1.159607  | 3.131115  |
| C | 3.340862  | 2.062571  | -0.615267 |
| H | 4.126360  | 1.622698  | -1.230811 |
| H | 2.486134  | 2.282622  | -1.260252 |
| H | 3.720087  | 3.011530  | -0.222731 |
| C | 1.985200  | 1.943358  | 1.495516  |
| H | 1.103456  | 2.308901  | 0.974164  |
| H | 1.657578  | 1.334159  | 2.342636  |
| H | 2.518007  | 2.809931  | 1.897723  |
| C | 4.197546  | -1.026496 | -1.391998 |
| H | 4.665925  | -1.962128 | -1.713059 |
| H | 3.882313  | -0.493570 | -2.294340 |
| H | 4.967745  | -0.437194 | -0.896226 |
| C | -4.015660 | 1.285228  | 0.793465  |
| H | -3.705287 | 2.210999  | 1.281972  |
| H | -4.333510 | 1.525285  | -0.226488 |
| H | -4.908192 | 0.930387  | 1.323375  |
| C | 4.187259  | 0.845897  | 1.424944  |
| H | 4.978587  | 0.327530  | 0.885641  |
| H | 4.605320  | 1.799699  | 1.761608  |
| H | 3.939768  | 0.269253  | 2.320293  |
| C | 2.086785  | -2.307876 | -1.313188 |
| H | 2.650580  | -3.206621 | -1.578955 |
| H | 1.201011  | -2.617996 | -0.756254 |
| H | 1.772853  | -1.831949 | -2.246095 |
| C | 3.467770  | -2.177891 | 0.750182  |
| H | 3.893081  | -3.124532 | 0.402246  |
| H | 4.236002  | -1.669679 | 1.329215  |
| H | 2.635672  | -2.416192 | 1.418413  |
| C | -1.647813 | 1.787655  | -1.832821 |
| H | -1.398365 | 2.313692  | -2.749119 |
| H | -2.718578 | 1.571984  | -1.831080 |
| C | -1.205142 | 2.619161  | -0.630264 |
| H | -2.086753 | 3.021434  | -0.123720 |
| H | -0.716109 | 2.026260  | 0.191349  |
| C | -0.233036 | 3.743867  | -1.003794 |
| H | -0.737302 | 4.462561  | -1.656354 |
| H | 0.119578  | 4.281327  | -0.119771 |
| H | 0.638669  | 3.358311  | -1.538398 |
| C | -1.078513 | -1.145055 | -2.291650 |
| H | -0.203498 | -1.770249 | -2.189126 |
| H | -2.023216 | -1.668823 | -2.379528 |
| C | -0.968242 | 0.092507  | -2.952812 |
| H | -1.756399 | 0.402606  | -3.628766 |
| H | 0.017300  | 0.471160  | -3.212696 |

70

# **2F-bsi**

|    |           |           |           |
|----|-----------|-----------|-----------|
| Ti | -0.838971 | -0.010952 | -0.220455 |
| C  | -1.457082 | -2.219564 | 0.196027  |
| C  | -1.239028 | -1.604328 | 1.468950  |
| N  | 0.990758  | -0.080036 | -0.037663 |
| C  | -2.206384 | -0.568611 | 1.620868  |
| C  | -2.609562 | -1.602461 | -0.409535 |

|   |           |           |           |
|---|-----------|-----------|-----------|
| C | -0.767999 | -3.451349 | -0.320621 |
| H | 0.243513  | -3.553265 | 0.077043  |
| H | -1.329959 | -4.343869 | -0.018111 |
| H | -0.708104 | -3.465950 | -1.412018 |
| C | 2.268857  | -0.062520 | -0.036904 |
| C | -3.070009 | -0.586554 | 0.470644  |
| C | 3.029734  | -1.062996 | -0.964362 |
| C | -3.278718 | -2.064144 | -1.671152 |
| H | -3.905414 | -1.285910 | -2.111679 |
| H | -2.557963 | -2.384023 | -2.428333 |
| H | -3.927605 | -2.922274 | -1.457243 |
| C | -0.224249 | -2.029658 | 2.490764  |
| H | 0.032617  | -1.217593 | 3.174662  |
| H | -0.625330 | -2.850748 | 3.097400  |
| H | 0.699040  | -2.385180 | 2.027995  |
| C | 2.975097  | 0.969549  | 0.901188  |
| C | -2.361585 | 0.319230  | 2.826991  |
| H | -2.842581 | 1.269336  | 2.581484  |
| H | -2.988663 | -0.173106 | 3.580196  |
| H | -1.402126 | 0.540604  | 3.302256  |
| C | 3.416895  | 2.193308  | 0.054661  |
| H | 4.217181  | 1.960215  | -0.647362 |
| H | 2.576068  | 2.609696  | -0.509628 |
| H | 3.784625  | 2.973552  | 0.728546  |
| C | 1.987526  | 1.469229  | 1.976761  |
| H | 1.136214  | 1.995801  | 1.541286  |
| H | 1.609079  | 0.643335  | 2.586246  |
| H | 2.504391  | 2.168109  | 2.640873  |
| C | 4.275443  | -0.455178 | -1.650498 |
| H | 4.728266  | -1.225227 | -2.282503 |
| H | 4.007141  | 0.382173  | -2.301032 |
| H | 5.044340  | -0.120496 | -0.954786 |
| C | -4.284317 | 0.273147  | 0.266371  |
| H | -4.206386 | 1.229553  | 0.789013  |
| H | -4.469031 | 0.478588  | -0.790853 |
| H | -5.173925 | -0.234407 | 0.659442  |
| C | 4.192533  | 0.381265  | 1.653004  |
| H | 4.992220  | 0.039740  | 0.996582  |
| H | 4.613247  | 1.163654  | 2.292113  |
| H | 3.899919  | -0.448244 | 2.303432  |
| C | 2.097225  | -1.551344 | -2.092635 |
| H | 2.648763  | -2.237408 | -2.741966 |
| H | 1.228753  | -2.085669 | -1.705647 |
| H | 1.746464  | -0.717937 | -2.709260 |
| C | 3.447457  | -2.295294 | -0.117634 |
| H | 3.881663  | -3.048766 | -0.782361 |
| H | 4.191836  | -2.056746 | 0.642370  |
| H | 2.582916  | -2.747707 | 0.378053  |
| C | -1.827486 | 3.057162  | -1.600700 |
| H | -1.630374 | 4.070161  | -1.970215 |
| H | -2.858300 | 2.820355  | -1.888742 |
| C | -1.703113 | 3.075782  | -0.066018 |
| H | -2.657863 | 3.347995  | 0.396951  |
| H | -1.527333 | 2.035606  | 0.317762  |
| C | -0.599703 | 3.993939  | 0.463111  |
| H | -0.843060 | 5.033297  | 0.220827  |
| H | -0.496208 | 3.923004  | 1.549692  |
| H | 0.371457  | 3.770353  | 0.011135  |
| C | -1.378510 | 0.598807  | -2.119658 |
| H | -0.769829 | -0.095465 | -2.725972 |

|   |           |          |           |
|---|-----------|----------|-----------|
| H | -2.414916 | 0.500853 | -2.450543 |
| C | -0.885225 | 2.052621 | -2.281367 |
| H | -0.806707 | 2.285424 | -3.352121 |
| H | 0.137238  | 2.179545 | -1.890870 |

64

**2TS<sub>E</sub>**

|    |           |           |           |
|----|-----------|-----------|-----------|
| Ti | -0.920157 | 0.294629  | -0.333586 |
| C  | -2.905259 | -0.980220 | -0.493150 |
| C  | -1.841193 | -1.803247 | 0.013529  |
| N  | 0.868882  | 0.019409  | -0.053798 |
| C  | -1.475118 | -1.303270 | 1.300501  |
| C  | -3.171112 | 0.036174  | 0.464840  |
| C  | -3.654362 | -1.228022 | -1.775107 |
| H  | -2.998518 | -1.560558 | -2.586039 |
| H  | -4.399226 | -2.019348 | -1.627574 |
| H  | -4.194779 | -0.341704 | -2.116903 |
| C  | 2.146238  | -0.045991 | -0.014797 |
| C  | -2.267008 | -0.141361 | 1.566815  |
| C  | 2.853021  | -0.943124 | -1.082211 |
| C  | -4.242969 | 1.084872  | 0.379629  |
| H  | -3.953630 | 2.004944  | 0.893660  |
| H  | -4.499467 | 1.335107  | -0.653587 |
| H  | -5.162332 | 0.724166  | 0.857074  |
| C  | -1.336588 | -3.067573 | -0.626614 |
| H  | -0.335490 | -3.328881 | -0.277225 |
| H  | -1.998551 | -3.906796 | -0.379685 |
| H  | -1.305480 | -2.998006 | -1.718092 |
| C  | 2.898012  | 0.763538  | 1.086673  |
| C  | -0.515657 | -1.955482 | 2.252876  |
| H  | -0.147498 | -1.252237 | 3.001903  |
| H  | -1.019415 | -2.769255 | 2.788621  |
| H  | 0.347060  | -2.386043 | 1.739106  |
| C  | 3.480798  | 2.049606  | 0.438708  |
| H  | 4.268646  | 1.848662  | -0.286540 |
| H  | 2.695824  | 2.633001  | -0.052900 |
| H  | 3.909619  | 2.673549  | 1.229097  |
| C  | 1.919212  | 1.206560  | 2.193311  |
| H  | 1.123350  | 1.845976  | 1.807455  |
| H  | 1.457337  | 0.345900  | 2.684305  |
| H  | 2.472370  | 1.768317  | 2.951650  |
| C  | 4.171804  | -0.360930 | -1.639192 |
| H  | 4.580047  | -1.067158 | -2.368674 |
| H  | 4.005995  | 0.585891  | -2.161331 |
| H  | 4.938380  | -0.206960 | -0.880167 |
| C  | -2.283908 | 0.633567  | 2.854519  |
| H  | -1.288887 | 0.705454  | 3.299140  |
| H  | -2.655814 | 1.649938  | 2.710970  |
| H  | -2.936989 | 0.139045  | 3.583940  |
| C  | 4.029524  | -0.039316 | 1.771306  |
| H  | 4.821704  | -0.351280 | 1.090711  |
| H  | 4.491145  | 0.596345  | 2.532972  |
| H  | 3.639938  | -0.926125 | 2.279821  |
| C  | 1.917628  | -1.172207 | -2.289132 |
| H  | 2.430849  | -1.791379 | -3.030501 |
| H  | 0.998434  | -1.689903 | -2.005156 |
| H  | 1.653694  | -0.226962 | -2.775579 |
| C  | 3.127576  | -2.325706 | -0.428343 |
| H  | 3.521431  | -3.004232 | -1.191697 |
| H  | 3.858623  | -2.275371 | 0.378778  |

|   |           |           |           |
|---|-----------|-----------|-----------|
| H | 2.206953  | -2.766026 | -0.033023 |
| C | -0.254544 | 3.682246  | -1.186080 |
| H | -0.213329 | 4.069099  | -0.166226 |
| H | 0.718755  | 3.268693  | -1.460297 |
| H | -0.459585 | 4.530355  | -1.853168 |
| C | -1.361135 | 2.687667  | -1.363894 |
| C | -1.296981 | 1.594567  | -2.196208 |
| H | -1.104697 | 1.794748  | 0.425059  |
| H | -2.333079 | 2.981326  | -0.973759 |
| H | -2.211953 | 1.117136  | -2.542286 |
| H | -0.388045 | 1.398785  | -2.766232 |

64

**2H-E**

|    |           |           |           |
|----|-----------|-----------|-----------|
| Ti | -0.923182 | 0.376114  | -0.186225 |
| C  | -2.886530 | -0.833477 | -0.716751 |
| C  | -1.826192 | -1.750655 | -0.409139 |
| N  | 0.860181  | -0.000761 | -0.027704 |
| C  | -1.490713 | -1.585333 | 0.969717  |
| C  | -3.183600 | -0.090066 | 0.459900  |
| C  | -3.606221 | -0.757224 | -2.036715 |
| H  | -2.929986 | -0.870705 | -2.890092 |
| H  | -4.342266 | -1.567039 | -2.108613 |
| H  | -4.154036 | 0.180809  | -2.157676 |
| C  | 2.138295  | -0.064772 | -0.001636 |
| C  | -2.306539 | -0.537522 | 1.503864  |
| C  | 2.858194  | -0.616815 | -1.274295 |
| C  | -4.250429 | 0.956048  | 0.613506  |
| H  | -3.949230 | 1.741932  | 1.311148  |
| H  | -4.513009 | 1.424940  | -0.338816 |
| H  | -5.168503 | 0.505566  | 1.010498  |
| C  | -1.293650 | -2.813397 | -1.330185 |
| H  | -0.288285 | -3.130757 | -1.045358 |
| H  | -1.938476 | -3.700340 | -1.296601 |
| H  | -1.260723 | -2.482855 | -2.372491 |
| C  | 2.880742  | 0.417077  | 1.283558  |
| C  | -0.548950 | -2.457963 | 1.747508  |
| H  | -0.235886 | -1.984894 | 2.679645  |
| H  | -1.046520 | -3.399530 | 2.009851  |
| H  | 0.347999  | -2.708953 | 1.176050  |
| C  | 3.388533  | 1.862858  | 1.024581  |
| H  | 4.156176  | 1.918177  | 0.252788  |
| H  | 2.562260  | 2.523376  | 0.743342  |
| H  | 3.822110  | 2.250720  | 1.951681  |
| C  | 1.911401  | 0.474323  | 2.481929  |
| H  | 1.075488  | 1.152687  | 2.304494  |
| H  | 1.507472  | -0.514938 | 2.712681  |
| H  | 2.457981  | 0.825779  | 3.361984  |
| C  | 4.146105  | 0.145732  | -1.660163 |
| H  | 4.570321  | -0.321816 | -2.554071 |
| H  | 3.935836  | 1.190290  | -1.908372 |
| H  | 4.917139  | 0.123354  | -0.890780 |
| C  | -2.368140 | -0.119044 | 2.945403  |
| H  | -1.386450 | -0.158465 | 3.422056  |
| H  | -2.748030 | 0.898411  | 3.054885  |
| H  | -3.035006 | -0.788256 | 3.502863  |
| C  | 4.063682  | -0.488753 | 1.699162  |
| H  | 4.853857  | -0.556265 | 0.951510  |
| H  | 4.513621  | -0.071747 | 2.605200  |
| H  | 3.726902  | -1.501096 | 1.940624  |

|   |           |           |           |
|---|-----------|-----------|-----------|
| C | 1.915487  | -0.551216 | -2.494804 |
| H | 2.437582  | -0.940153 | -3.373751 |
| H | 1.013281  | -1.149886 | -2.351749 |
| H | 1.621929  | 0.480279  | -2.717445 |
| C | 3.189670  | -2.113233 | -1.017207 |
| H | 3.588418  | -2.548253 | -1.939147 |
| H | 3.935273  | -2.255237 | -0.235078 |
| H | 2.291561  | -2.676103 | -0.744098 |
| C | -0.198107 | 3.939032  | -0.484559 |
| H | -0.112153 | 3.995974  | 0.603842  |
| H | 0.754657  | 3.619415  | -0.913055 |
| H | -0.412190 | 4.955191  | -0.841782 |
| C | -1.328655 | 3.052093  | -0.889223 |
| C | -1.269365 | 2.084500  | -1.842636 |
| H | -1.062297 | 1.535562  | 1.010942  |
| H | -2.291429 | 3.263125  | -0.426081 |
| H | -2.182491 | 1.633465  | -2.227355 |
| H | -0.354282 | 1.925883  | -2.413679 |

70

## 2G

|    |           |           |           |
|----|-----------|-----------|-----------|
| Ti | -0.763725 | 0.281715  | -0.008807 |
| C  | -2.224078 | -1.411031 | -0.964467 |
| C  | -1.679871 | -1.886725 | 0.268389  |
| N  | 1.075131  | 0.047327  | 0.153532  |
| C  | -2.196544 | -1.071062 | 1.321816  |
| C  | -3.090230 | -0.312311 | -0.668345 |
| C  | -2.083602 | -2.088481 | -2.296659 |
| H  | -1.079237 | -2.488737 | -2.455291 |
| H  | -2.783621 | -2.931198 | -2.359756 |
| H  | -2.314479 | -1.418704 | -3.127682 |
| C  | 2.339347  | -0.127161 | 0.038741  |
| C  | -3.068221 | -0.094968 | 0.738007  |
| C  | 2.846879  | -1.557801 | -0.358227 |
| C  | -3.985620 | 0.380155  | -1.654545 |
| H  | -4.336815 | 1.346962  | -1.286216 |
| H  | -3.500928 | 0.538585  | -2.622217 |
| H  | -4.875474 | -0.232783 | -1.844094 |
| C  | -0.990657 | -3.205581 | 0.480786  |
| H  | -0.320750 | -3.190980 | 1.342704  |
| H  | -1.747842 | -3.976813 | 0.674275  |
| H  | -0.419092 | -3.530498 | -0.389314 |
| C  | 3.302320  | 1.058564  | 0.353818  |
| C  | -2.047774 | -1.405586 | 2.783323  |
| H  | -2.559340 | -0.686750 | 3.426417  |
| H  | -2.502186 | -2.383378 | 2.982692  |
| H  | -1.003266 | -1.469225 | 3.104869  |
| C  | 4.131459  | 1.446684  | -0.899250 |
| H  | 4.896071  | 0.718475  | -1.158237 |
| H  | 3.488496  | 1.599387  | -1.772794 |
| H  | 4.640028  | 2.394558  | -0.698511 |
| C  | 2.515994  | 2.312982  | 0.773626  |
| H  | 1.818456  | 2.631927  | -0.004198 |
| H  | 1.960862  | 2.151554  | 1.698888  |
| H  | 3.218735  | 3.131963  | 0.951307  |
| C  | 4.294479  | -1.689578 | -0.881617 |
| H  | 4.492719  | -2.754567 | -1.038573 |
| H  | 4.429734  | -1.197016 | -1.846833 |
| H  | 5.056637  | -1.327045 | -0.192215 |
| C  | -3.948664 | 0.875903  | 1.477797  |

|   |           |           |           |
|---|-----------|-----------|-----------|
| H | -3.564822 | 1.117412  | 2.471369  |
| H | -4.083064 | 1.814228  | 0.932215  |
| H | -4.946807 | 0.444013  | 1.619836  |
| C | 4.233158  | 0.692091  | 1.538315  |
| H | 4.886292  | -0.155855 | 1.335726  |
| H | 4.873354  | 1.551560  | 1.760976  |
| H | 3.654069  | 0.469013  | 2.440288  |
| C | 1.941228  | -2.114616 | -1.478969 |
| H | 2.226126  | -3.147865 | -1.699365 |
| H | 0.890809  | -2.095803 | -1.198564 |
| H | 2.058950  | -1.534014 | -2.400052 |
| C | 2.713203  | -2.428188 | 0.920046  |
| H | 2.946939  | -3.469622 | 0.677228  |
| H | 3.407320  | -2.106428 | 1.701612  |
| H | 1.700363  | -2.387159 | 1.324517  |
| C | -0.320655 | 3.500842  | -2.038698 |
| H | -0.685929 | 4.439725  | -1.611165 |
| H | 0.732414  | 3.384976  | -1.767201 |
| H | -0.375026 | 3.581065  | -3.127985 |
| C | -1.159023 | 2.301862  | -1.568155 |
| C | -0.672255 | 0.936093  | -2.002276 |
| H | -1.181183 | 2.372995  | -0.438579 |
| H | -2.208886 | 2.441010  | -1.837926 |
| H | -1.259234 | 0.474205  | -2.790510 |
| H | 0.388913  | 0.924577  | -2.261932 |
| C | -0.877421 | 2.648163  | 1.828959  |
| C | -0.605836 | 1.558134  | 2.564892  |
| H | -0.091071 | 3.217188  | 1.344123  |
| H | -1.885108 | 3.049242  | 1.766221  |
| H | -1.379542 | 1.057850  | 3.131550  |
| H | 0.406760  | 1.192658  | 2.697594  |

70

## 2TSr

|    |           |           |           |
|----|-----------|-----------|-----------|
| Ti | -0.770836 | 0.245367  | 0.213709  |
| C  | -2.135697 | -1.167832 | -1.166279 |
| C  | -1.784340 | -1.876829 | 0.022423  |
| N  | 1.071388  | 0.032184  | 0.098172  |
| C  | -2.445249 | -1.245842 | 1.123044  |
| C  | -3.010017 | -0.094958 | -0.793783 |
| C  | -1.854368 | -1.634974 | -2.569676 |
| H  | -0.809436 | -1.915212 | -2.724290 |
| H  | -2.461991 | -2.520288 | -2.793674 |
| H  | -2.115319 | -0.881318 | -3.316651 |
| C  | 2.338299  | -0.155135 | 0.055877  |
| C  | -3.197013 | -0.142284 | 0.616521  |
| C  | 2.858541  | -1.530133 | -0.492546 |
| C  | -3.773377 | 0.785705  | -1.744662 |
| H  | -4.064588 | 1.735196  | -1.287994 |
| H  | -3.219511 | 1.003240  | -2.661536 |
| H  | -4.699810 | 0.283452  | -2.049692 |
| C  | -1.115551 | -3.222013 | 0.096953  |
| H  | -0.498059 | -3.331414 | 0.992103  |
| H  | -1.881869 | -4.006884 | 0.138946  |
| H  | -0.491369 | -3.428576 | -0.773094 |
| C  | 3.294890  | 0.950266  | 0.603240  |
| C  | -2.521256 | -1.824514 | 2.508153  |
| H  | -2.959359 | -1.128748 | 3.226707  |
| H  | -3.161223 | -2.715452 | 2.497861  |
| H  | -1.543315 | -2.134506 | 2.887623  |

|   |           |           |           |
|---|-----------|-----------|-----------|
| C | 4.161402  | 1.540036  | -0.540833 |
| H | 4.908671  | 0.848237  | -0.922532 |
| H | 3.541262  | 1.873853  | -1.380161 |
| H | 4.693135  | 2.416985  | -0.158695 |
| C | 2.496023  | 2.117504  | 1.210441  |
| H | 1.824042  | 2.571168  | 0.480150  |
| H | 1.908162  | 1.799079  | 2.073548  |
| H | 3.193767  | 2.887478  | 1.552324  |
| C | 4.312935  | -1.583929 | -1.011818 |
| H | 4.522979  | -2.617235 | -1.305498 |
| H | 4.452600  | -0.966299 | -1.902250 |
| H | 5.065405  | -1.308164 | -0.273746 |
| C | -4.126565 | 0.726578  | 1.415989  |
| H | -3.762232 | 0.896911  | 2.433148  |
| H | -4.284960 | 1.701495  | 0.947835  |
| H | -5.110161 | 0.249951  | 1.508113  |
| C | 4.193534  | 0.389508  | 1.735184  |
| H | 4.860672  | -0.408977 | 1.413362  |
| H | 4.819341  | 1.201218  | 2.119478  |
| H | 3.590449  | 0.016288  | 2.568977  |
| C | 1.970249  | -1.968352 | -1.675871 |
| H | 2.282173  | -2.958493 | -2.021547 |
| H | 0.922043  | -2.014544 | -1.391793 |
| H | 2.068534  | -1.275735 | -2.518845 |
| C | 2.709832  | -2.548171 | 0.670093  |
| H | 2.965625  | -3.549694 | 0.309677  |
| H | 3.376419  | -2.316163 | 1.504668  |
| H | 1.684502  | -2.571280 | 1.046636  |
| C | -0.134420 | 3.864961  | -1.255107 |
| H | -0.498094 | 4.280945  | -0.310654 |
| H | 0.945598  | 3.716926  | -1.192176 |
| H | -0.325117 | 4.625982  | -2.022445 |
| C | -0.859467 | 2.611829  | -1.648501 |
| C | -0.272459 | 1.494591  | -2.141910 |
| H | -1.175904 | 2.080869  | 0.358473  |
| H | -1.943993 | 2.688989  | -1.690937 |
| H | -0.849016 | 0.725947  | -2.638882 |
| H | 0.807068  | 1.416443  | -2.207136 |
| C | -0.989706 | 2.161785  | 1.794185  |
| C | -0.743558 | 0.832089  | 2.307016  |
| H | -0.167117 | 2.872317  | 1.772036  |
| H | -1.949564 | 2.620634  | 2.023419  |
| H | -1.506364 | 0.418356  | 2.953148  |
| H | 0.268602  | 0.614340  | 2.638390  |

70

## 2H-T

|    |           |           |           |
|----|-----------|-----------|-----------|
| Ti | 0.767007  | 0.146595  | -0.256497 |
| C  | 2.077139  | -1.104107 | 1.278349  |
| C  | 1.758164  | -1.937461 | 0.161286  |
| N  | -1.072006 | -0.030519 | -0.084582 |
| C  | 2.453362  | -1.426618 | -0.982281 |
| C  | 2.968120  | -0.080472 | 0.818672  |
| C  | 1.727599  | -1.394644 | 2.713342  |
| H  | 0.686464  | -1.700301 | 2.841299  |
| H  | 2.353814  | -2.212351 | 3.091104  |
| H  | 1.907982  | -0.535956 | 3.364615  |
| C  | -2.344883 | -0.171051 | -0.045465 |
| C  | 3.197180  | -0.279910 | -0.573431 |
| C  | -2.915967 | -1.521501 | 0.508270  |

|   |           |           |           |
|---|-----------|-----------|-----------|
| C | 3.710114  | 0.894198  | 1.691754  |
| H | 3.999104  | 1.799783  | 1.152240  |
| H | 3.141253  | 1.188419  | 2.577074  |
| H | 4.636753  | 0.430996  | 2.052930  |
| C | 1.085377  | -3.282189 | 0.206760  |
| H | 0.435165  | -3.456319 | -0.654550 |
| H | 1.849789  | -4.069622 | 0.195357  |
| H | 0.494264  | -3.421720 | 1.112259  |
| C | -3.249562 | 0.967595  | -0.611302 |
| C | 2.549785  | -2.133988 | -2.303399 |
| H | 2.963664  | -1.496245 | -3.086938 |
| H | 3.217432  | -2.999510 | -2.208819 |
| H | 1.581171  | -2.508375 | -2.646070 |
| C | -4.125744 | 1.588019  | 0.508388  |
| H | -4.908244 | 0.923439  | 0.867426  |
| H | -3.519331 | 1.899523  | 1.366001  |
| H | -4.614628 | 2.483215  | 0.111725  |
| C | -2.395064 | 2.103421  | -1.203258 |
| H | -1.720197 | 2.536383  | -0.462449 |
| H | -1.801531 | 1.758602  | -2.051924 |
| H | -3.057058 | 2.896958  | -1.562118 |
| C | -4.385614 | -1.530679 | 0.984086  |
| H | -4.630760 | -2.554178 | 1.284678  |
| H | -4.535458 | -0.897722 | 1.861835  |
| H | -5.108293 | -1.246088 | 0.219943  |
| C | 4.150268  | 0.498097  | -1.435704 |
| H | 3.806272  | 0.567845  | -2.471570 |
| H | 4.309217  | 1.513645  | -1.064163 |
| H | 5.130659  | 0.006753  | -1.458808 |
| C | -4.136364 | 0.430172  | -1.764353 |
| H | -4.836241 | -0.345395 | -1.456141 |
| H | -4.725947 | 1.259826  | -2.167214 |
| H | -3.524166 | 0.034242  | -2.580781 |
| C | -2.071405 | -1.956934 | 1.724651  |
| H | -2.419208 | -2.930312 | 2.083389  |
| H | -1.018420 | -2.038524 | 1.467829  |
| H | -2.171909 | -1.242185 | 2.548549  |
| C | -2.757601 | -2.562591 | -0.632387 |
| H | -3.051991 | -3.550565 | -0.264396 |
| H | -3.390827 | -2.326333 | -1.491667 |
| H | -1.721676 | -2.618711 | -0.975539 |
| C | 0.333428  | 4.229726  | 0.942049  |
| H | 0.765806  | 4.472428  | -0.035702 |
| H | -0.753521 | 4.178901  | 0.847472  |
| H | 0.580310  | 5.070935  | 1.601490  |
| C | 0.916802  | 2.972717  | 1.509635  |
| C | 0.215321  | 1.908400  | 1.946729  |
| H | 1.199190  | 2.133692  | -0.816371 |
| H | 1.998978  | 2.966754  | 1.627029  |
| H | 0.693656  | 1.100141  | 2.489427  |
| H | -0.868602 | 1.895628  | 1.908914  |
| C | 1.082447  | 1.984707  | -1.931707 |
| C | 0.769134  | 0.552695  | -2.310456 |
| H | 0.294493  | 2.695753  | -2.186223 |
| H | 2.039759  | 2.327879  | -2.327762 |
| H | 1.493978  | 0.109555  | -2.984781 |
| H | -0.243500 | 0.402059  | -2.684932 |

49

## 3A

|    |           |           |           |
|----|-----------|-----------|-----------|
| C  | -1.213976 | -1.073358 | -1.122777 |
| C  | -2.384879 | -0.266613 | -0.982455 |
| C  | -0.660477 | -1.545750 | -2.445077 |
| H  | -0.433615 | -2.613807 | -2.399824 |
| H  | 0.263900  | -1.034609 | -2.740303 |
| H  | -1.386514 | -1.398023 | -3.246556 |
| C  | -3.281367 | 0.212224  | -2.092875 |
| H  | -4.073238 | -0.522900 | -2.282051 |
| H  | -2.745027 | 0.354171  | -3.034841 |
| H  | -3.775788 | 1.154303  | -1.841453 |
| C  | 2.063260  | -2.663062 | -0.751129 |
| H  | 1.970084  | -2.407377 | -1.807812 |
| H  | 1.632601  | -3.661448 | -0.606566 |
| H  | 3.130216  | -2.738287 | -0.517294 |
| C  | 3.503405  | 0.547034  | -1.156345 |
| H  | 3.982422  | -0.259329 | -0.593805 |
| H  | 4.280607  | 1.268614  | -1.427008 |
| H  | 3.091230  | 0.127364  | -2.078919 |
| C  | -1.555224 | -0.684553 | 1.130909  |
| C  | -2.606429 | -0.044071 | 0.412279  |
| C  | -1.487958 | -0.767212 | 2.627814  |
| H  | -2.071757 | -1.633746 | 2.962712  |
| H  | -0.472189 | -0.901350 | 2.995700  |
| H  | -1.912957 | 0.115438  | 3.110144  |
| C  | -3.791763 | 0.652215  | 1.010287  |
| H  | -4.594699 | -0.072348 | 1.194007  |
| H  | -3.555029 | 1.120853  | 1.967657  |
| H  | -4.196208 | 1.421792  | 0.348360  |
| C  | 1.841070  | -1.819046 | 2.161401  |
| H  | 1.642115  | -1.014741 | 2.873540  |
| H  | 1.397480  | -2.742796 | 2.549645  |
| H  | 2.925861  | -1.972113 | 2.133355  |
| C  | 3.021257  | 1.786062  | 0.987033  |
| H  | 3.457491  | 0.975870  | 1.578123  |
| H  | 3.815052  | 2.506671  | 0.766077  |
| H  | 2.265567  | 2.283719  | 1.600903  |
| Si | 1.226919  | -1.453993 | 0.421836  |
| N  | 1.323765  | 0.269699  | -0.012954 |
| C  | -0.660436 | -1.314226 | 0.186049  |
| C  | 2.413682  | 1.234788  | -0.314170 |
| C  | 1.787823  | 2.377958  | -1.151984 |
| H  | 1.368389  | 1.994385  | -2.095715 |
| H  | 1.023449  | 2.943702  | -0.596193 |
| H  | 2.535042  | 3.125183  | -1.435265 |
| Ti | -0.437278 | 0.896581  | -0.224989 |
| C  | -0.888683 | 2.390349  | 1.137393  |
| H  | -1.452850 | 2.189717  | 2.048403  |
| H  | -0.000417 | 2.974276  | 1.402866  |
| H  | -1.530160 | 3.023611  | 0.488732  |

55

### 3B

|   |          |           |          |
|---|----------|-----------|----------|
| C | 1.466081 | -0.839408 | 1.258228 |
| C | 2.580776 | -0.356159 | 0.506439 |
| C | 1.350420 | -0.777421 | 2.759234 |
| H | 1.473986 | -1.784233 | 3.173567 |
| H | 0.383141 | -0.409687 | 3.106190 |
| H | 2.131188 | -0.155031 | 3.201655 |
| C | 3.808340 | 0.316326  | 1.054266 |
| H | 4.576371 | -0.430964 | 1.288835 |

|    |           |           |           |
|----|-----------|-----------|-----------|
| H  | 3.609803  | 0.867627  | 1.976674  |
| H  | 4.251143  | 1.009823  | 0.334200  |
| C  | -1.922584 | -1.638681 | 2.364033  |
| H  | -1.741155 | -0.762046 | 2.990707  |
| H  | -1.431458 | -2.498537 | 2.833359  |
| H  | -2.999463 | -1.833877 | 2.377859  |
| C  | -3.772228 | 0.659982  | 0.504486  |
| H  | -4.047294 | -0.395917 | 0.425210  |
| H  | -4.656655 | 1.244483  | 0.233408  |
| H  | -3.529255 | 0.880477  | 1.548010  |
| C  | 1.149021  | -1.420511 | -0.954154 |
| C  | 2.393586  | -0.731447 | -0.859738 |
| C  | 0.603606  | -2.028441 | -2.219219 |
| H  | 0.496486  | -3.111133 | -2.097384 |
| H  | -0.376804 | -1.631147 | -2.493994 |
| H  | 1.275209  | -1.854631 | -3.061311 |
| C  | 3.393742  | -0.536656 | -1.960835 |
| H  | 4.052213  | -1.411154 | -2.029419 |
| H  | 2.918131  | -0.407360 | -2.935030 |
| H  | 4.030687  | 0.333466  | -1.784093 |
| C  | -2.256151 | -2.712010 | -0.454551 |
| H  | -2.092659 | -2.633428 | -1.530063 |
| H  | -1.934623 | -3.712704 | -0.140242 |
| H  | -3.333851 | -2.651021 | -0.271320 |
| C  | -2.966155 | 0.652352  | -1.885057 |
| H  | -3.171750 | -0.416609 | -1.984160 |
| H  | -3.863254 | 1.195461  | -2.198726 |
| H  | -2.154184 | 0.912426  | -2.570429 |
| Si | -1.334509 | -1.440528 | 0.584162  |
| N  | -1.373542 | 0.255420  | -0.023242 |
| C  | 0.547573  | -1.480024 | 0.360926  |
| C  | -2.601819 | 1.017843  | -0.431943 |
| C  | -2.353168 | 2.534460  | -0.330445 |
| H  | -2.134009 | 2.830714  | 0.700265  |
| H  | -1.535969 | 2.861731  | -0.980730 |
| H  | -3.244940 | 3.084117  | -0.645157 |
| Ti | 0.458229  | 0.686696  | -0.276295 |
| C  | 0.803625  | 1.518720  | -2.145776 |
| H  | 0.681383  | 0.831867  | -2.989455 |
| H  | 0.092514  | 2.345799  | -2.279964 |
| H  | 1.821874  | 1.928595  | -2.195831 |
| C  | 1.219320  | 2.982152  | 0.717245  |
| C  | 0.691429  | 2.498351  | 1.856356  |
| H  | -0.348211 | 2.667329  | 2.119376  |
| H  | 1.296028  | 1.959942  | 2.578463  |
| H  | 2.277633  | 2.871735  | 0.492235  |
| H  | 0.632135  | 3.589451  | 0.033246  |

55

### 3TS(B-C)

|   |           |           |           |
|---|-----------|-----------|-----------|
| C | -1.380755 | -1.170597 | -1.080943 |
| C | -2.561094 | -0.592305 | -0.522525 |
| C | -1.202677 | -1.466783 | -2.544109 |
| H | -1.602985 | -2.463854 | -2.765059 |
| H | -0.158298 | -1.462119 | -2.851508 |
| H | -1.743219 | -0.758155 | -3.176206 |
| C | -3.778473 | -0.158443 | -1.285131 |
| H | -4.467372 | -1.003709 | -1.405857 |
| H | -3.538001 | 0.195853  | -2.290670 |
| H | -4.330716 | 0.631087  | -0.768621 |

|    |           |           |           |
|----|-----------|-----------|-----------|
| C  | 2.072707  | -2.239528 | -1.745165 |
| H  | 1.949300  | -1.577227 | -2.605583 |
| H  | 1.578544  | -3.190546 | -1.973534 |
| H  | 3.142154  | -2.446505 | -1.640196 |
| C  | 3.835490  | 0.457041  | -0.628552 |
| H  | 4.101288  | -0.492542 | -0.154627 |
| H  | 4.714708  | 1.105192  | -0.564456 |
| H  | 3.628028  | 0.276601  | -1.686686 |
| C  | -1.164109 | -1.174094 | 1.220150  |
| C  | -2.427944 | -0.585065 | 0.892608  |
| C  | -0.670213 | -1.405574 | 2.628114  |
| H  | -0.479485 | -2.470461 | 2.791269  |
| H  | 0.259101  | -0.874067 | 2.854674  |
| H  | -1.414482 | -1.091287 | 3.362354  |
| C  | -3.485185 | -0.139026 | 1.864225  |
| H  | -4.152013 | -0.974716 | 2.108474  |
| H  | -3.065250 | 0.220383  | 2.807234  |
| H  | -4.109197 | 0.657902  | 1.451600  |
| C  | 2.262177  | -2.420992 | 1.280759  |
| H  | 2.095967  | -1.984372 | 2.266800  |
| H  | 1.913860  | -3.460615 | 1.311625  |
| H  | 3.342628  | -2.452648 | 1.105918  |
| C  | 2.967860  | 1.332787  | 1.563375  |
| H  | 3.144225  | 0.375195  | 2.060633  |
| H  | 3.869427  | 1.942949  | 1.677676  |
| H  | 2.152030  | 1.842133  | 2.087823  |
| Si | 1.397111  | -1.527408 | -0.135403 |
| N  | 1.410983  | 0.270191  | -0.041443 |
| C  | -0.496391 | -1.545022 | -0.002367 |
| C  | 2.638759  | 1.130525  | 0.070288  |
| C  | 2.407747  | 2.495380  | -0.604323 |
| H  | 2.222146  | 2.376901  | -1.675652 |
| H  | 1.567321  | 3.042774  | -0.163772 |
| H  | 3.292934  | 3.127309  | -0.487303 |
| Ti | -0.434516 | 0.683079  | 0.044101  |
| C  | -0.947084 | 2.404288  | 1.265316  |
| H  | -1.035089 | 1.445734  | 1.836694  |
| H  | 0.045805  | 2.840054  | 1.403718  |
| H  | -1.697658 | 3.055144  | 1.708361  |
| C  | -1.462987 | 2.814011  | -0.686493 |
| C  | -0.929514 | 1.897120  | -1.658457 |
| H  | -0.002259 | 2.191458  | -2.143798 |
| H  | -1.645442 | 1.419086  | -2.317112 |
| H  | -2.539220 | 2.836707  | -0.544143 |
| H  | -0.985740 | 3.782644  | -0.565163 |

55  
3C

|   |           |           |           |
|---|-----------|-----------|-----------|
| C | -1.204770 | -1.299637 | -1.100541 |
| C | -2.445479 | -0.764646 | -0.649844 |
| C | -0.877638 | -1.578696 | -2.540955 |
| H | -1.096592 | -2.628310 | -2.771999 |
| H | 0.172770  | -1.408066 | -2.773449 |
| H | -1.472977 | -0.962259 | -3.217195 |
| C | -3.630903 | -0.419067 | -1.499929 |
| H | -4.312045 | -1.276968 | -1.559866 |
| H | -3.346321 | -0.163477 | -2.522467 |
| H | -4.205741 | 0.415249  | -1.088345 |
| C | 2.297718  | -2.331673 | -1.466098 |
| H | 2.227122  | -1.761559 | -2.395009 |

|    |           |           |           |
|----|-----------|-----------|-----------|
| H  | 1.819787  | -3.304281 | -1.629652 |
| H  | 3.358740  | -2.517869 | -1.273712 |
| C  | 3.804440  | 0.598876  | -0.741703 |
| H  | 4.130016  | -0.308525 | -0.224090 |
| H  | 4.650023  | 1.293138  | -0.735187 |
| H  | 3.583141  | 0.348619  | -1.782638 |
| C  | -1.154886 | -1.232350 | 1.210916  |
| C  | -2.411059 | -0.707652 | 0.776134  |
| C  | -0.736143 | -1.363950 | 2.655309  |
| H  | -0.342169 | -2.364925 | 2.847851  |
| H  | 0.043546  | -0.651428 | 2.949834  |
| H  | -1.585429 | -1.211099 | 3.323899  |
| C  | -3.557052 | -0.276197 | 1.649226  |
| H  | -4.248892 | -1.113304 | 1.802739  |
| H  | -3.230704 | 0.056264  | 2.637424  |
| H  | -4.135877 | 0.533238  | 1.195742  |
| C  | 2.351537  | -2.158887 | 1.566361  |
| H  | 2.086094  | -1.642178 | 2.490220  |
| H  | 2.096322  | -3.218806 | 1.685679  |
| H  | 3.439790  | -2.105466 | 1.454475  |
| C  | 2.945841  | 1.563464  | 1.417771  |
| H  | 3.194855  | 0.653347  | 1.969797  |
| H  | 3.809181  | 2.234704  | 1.466840  |
| H  | 2.111392  | 2.054411  | 1.931324  |
| Si | 1.511500  | -1.481090 | 0.022375  |
| N  | 1.413221  | 0.312647  | -0.063113 |
| C  | -0.382840 | -1.599075 | 0.054144  |
| C  | 2.590443  | 1.248540  | -0.050634 |
| C  | 2.266729  | 2.555463  | -0.794443 |
| H  | 2.007479  | 2.360459  | -1.838990 |
| H  | 1.443773  | 3.108422  | -0.328238 |
| H  | 3.136874  | 3.218116  | -0.781324 |
| Ti | -0.463213 | 0.624350  | -0.010579 |
| C  | -1.209793 | 2.611735  | 1.153378  |
| H  | -1.323046 | 1.633758  | 1.679913  |
| H  | -0.157870 | 2.923729  | 1.182408  |
| H  | -1.744950 | 3.278658  | 1.833401  |
| C  | -1.844614 | 2.721418  | -0.278644 |
| C  | -1.154895 | 1.922941  | -1.425239 |
| H  | -0.303476 | 2.476756  | -1.831622 |
| H  | -1.849360 | 1.678173  | -2.225583 |
| H  | -2.900179 | 2.450143  | -0.203320 |
| H  | -1.797969 | 3.788722  | -0.518853 |

55  
3D

|   |           |           |           |
|---|-----------|-----------|-----------|
| C | -1.088903 | -1.649085 | -0.893513 |
| C | -2.379821 | -1.035788 | -0.749520 |
| C | -0.611095 | -2.247051 | -2.192482 |
| H | -1.211092 | -3.134949 | -2.425182 |
| H | 0.429782  | -2.558831 | -2.149311 |
| H | -0.728672 | -1.560919 | -3.039156 |
| C | -3.432100 | -0.946911 | -1.815974 |
| H | -4.055486 | -1.849644 | -1.806530 |
| H | -2.998132 | -0.865441 | -2.815501 |
| H | -4.097520 | -0.093378 | -1.665450 |
| C | 2.419160  | -2.748491 | -0.508241 |
| H | 2.454725  | -2.532330 | -1.578123 |
| H | 1.958592  | -3.734290 | -0.375601 |
| H | 3.452084  | -2.822209 | -0.154379 |

|    |           |           |           |
|----|-----------|-----------|-----------|
| C  | 3.781616  | 0.289100  | -0.954599 |
| H  | 4.143628  | -0.410071 | -0.194827 |
| H  | 4.606408  | 0.969284  | -1.187101 |
| H  | 3.544517  | -0.272875 | -1.862206 |
| C  | -1.310167 | -0.978453 | 1.299265  |
| C  | -2.514948 | -0.625305 | 0.600365  |
| C  | -1.092868 | -0.759420 | 2.779645  |
| H  | -0.630056 | -1.640517 | 3.228982  |
| H  | -0.452170 | 0.098130  | 3.011459  |
| H  | -2.046179 | -0.595182 | 3.286224  |
| C  | -3.737197 | 0.002757  | 1.202656  |
| H  | -4.433688 | -0.776211 | 1.537033  |
| H  | -3.502959 | 0.619796  | 2.073188  |
| H  | -4.274792 | 0.622132  | 0.479823  |
| C  | 2.145294  | -1.542804 | 2.271346  |
| H  | 1.760575  | -0.758608 | 2.925922  |
| H  | 1.910873  | -2.512843 | 2.725355  |
| H  | 3.237233  | -1.456341 | 2.252049  |
| C  | 2.942694  | 1.850576  | 0.833823  |
| H  | 3.236306  | 1.157992  | 1.627179  |
| H  | 3.783703  | 2.526104  | 0.648289  |
| H  | 2.100168  | 2.448057  | 1.196803  |
| Si | 1.475650  | -1.476348 | 0.514921  |
| N  | 1.405638  | 0.199286  | -0.164980 |
| C  | -0.418784 | -1.648103 | 0.387389  |
| C  | 2.568051  | 1.095405  | -0.458090 |
| C  | 2.166863  | 2.103261  | -1.550410 |
| H  | 1.860083  | 1.589937  | -2.468807 |
| H  | 1.350197  | 2.752502  | -1.218301 |
| H  | 3.008268  | 2.755819  | -1.800865 |
| Ti | -0.461751 | 0.449904  | -0.341070 |
| C  | -0.848947 | 4.014776  | 0.567736  |
| H  | 0.146134  | 4.108734  | 0.124722  |
| H  | -1.499816 | 4.750543  | 0.087863  |
| H  | -0.776206 | 4.263402  | 1.630333  |
| C  | -1.435430 | 2.611073  | 0.360726  |
| C  | -1.498162 | 2.085287  | -1.061739 |
| H  | -0.857995 | 2.637196  | -1.760407 |
| H  | -2.503834 | 1.975439  | -1.463491 |
| H  | -0.778214 | 1.928648  | 1.018871  |
| H  | -2.408056 | 2.521966  | 0.850352  |

61

### 3E-fsi

|   |           |           |          |
|---|-----------|-----------|----------|
| C | 0.573069  | -1.071328 | 1.581499 |
| C | 1.924645  | -1.155933 | 1.136264 |
| C | 0.157985  | -0.508666 | 2.915637 |
| H | -0.215603 | -1.312862 | 3.559100 |
| H | -0.632008 | 0.241270  | 2.836288 |
| H | 1.002626  | -0.043280 | 3.426392 |
| C | 3.141123  | -0.765083 | 1.922893 |
| H | 3.359263  | -1.527240 | 2.681049 |
| H | 3.010468  | 0.184529  | 2.448006 |
| H | 4.026076  | -0.677713 | 1.289354 |
| C | -3.078654 | -1.176335 | 1.940608 |
| H | -2.692371 | -0.573231 | 2.763243 |
| H | -3.096092 | -2.220841 | 2.276153 |
| H | -4.116933 | -0.880734 | 1.761606 |
| C | -2.371358 | 2.404916  | 1.184397 |
| H | -2.785058 | 1.720924  | 1.929987 |

|    |           |           |           |
|----|-----------|-----------|-----------|
| H  | -2.996065 | 3.303680  | 1.174654  |
| H  | -1.366062 | 2.696506  | 1.503196  |
| C  | 0.575939  | -2.165563 | -0.450622 |
| C  | 1.929926  | -1.827278 | -0.120418 |
| C  | 0.150888  | -2.963993 | -1.656787 |
| H  | -0.363839 | -3.875598 | -1.338098 |
| H  | -0.539101 | -2.424958 | -2.312440 |
| H  | 1.009020  | -3.272876 | -2.256998 |
| C  | 3.173177  | -2.250706 | -0.850534 |
| H  | 3.939257  | -1.470058 | -0.846622 |
| H  | 3.611014  | -3.128232 | -0.359303 |
| H  | 2.981393  | -2.529289 | -1.888185 |
| C  | -3.024732 | -2.028848 | -0.976789 |
| H  | -2.667408 | -1.835461 | -1.991263 |
| H  | -2.976503 | -3.109262 | -0.800324 |
| H  | -4.080251 | -1.742084 | -0.939565 |
| C  | -3.777162 | 1.378388  | -0.641042 |
| H  | -4.259685 | 0.717924  | 0.084580  |
| H  | -4.393143 | 2.279872  | -0.712219 |
| H  | -3.783273 | 0.890178  | -1.619956 |
| Si | -2.064635 | -1.103251 | 0.353704  |
| N  | -1.479573 | 0.525015  | -0.170973 |
| C  | -0.283673 | -1.698832 | 0.593683  |
| C  | -2.344798 | 1.758488  | -0.215176 |
| C  | -1.812268 | 2.776069  | -1.240810 |
| H  | -0.799118 | 3.113318  | -1.005374 |
| H  | -1.824712 | 2.359954  | -2.252184 |
| H  | -2.449795 | 3.664905  | -1.244199 |
| Ti | 0.398504  | 0.248250  | -0.301419 |
| C  | 1.469093  | 1.856889  | 0.473239  |
| C  | 1.605025  | -0.007988 | -2.687338 |
| C  | 0.594936  | 0.882004  | -2.760909 |
| H  | 2.594319  | 0.282008  | -2.344382 |
| H  | 1.488049  | -1.022796 | -3.048832 |
| H  | -0.368548 | 0.613985  | -3.182945 |
| H  | 0.744526  | 1.928460  | -2.504436 |
| H  | 1.525904  | 1.798362  | 1.567760  |
| H  | 0.769240  | 2.681694  | 0.251326  |
| C  | 2.853282  | 2.189575  | -0.116424 |
| H  | 3.539037  | 1.346234  | 0.031385  |
| H  | 2.777399  | 2.335991  | -1.203094 |
| C  | 3.478563  | 3.452643  | 0.497853  |
| H  | 3.621175  | 3.333244  | 1.576784  |
| H  | 4.454403  | 3.665850  | 0.049548  |
| H  | 2.837173  | 4.326023  | 0.340830  |

61

### 3TS(E-F)-fsi

|   |           |           |          |
|---|-----------|-----------|----------|
| C | 0.674899  | -1.325264 | 1.499248 |
| C | 1.954692  | -1.519869 | 0.888090 |
| C | 0.480168  | -0.842923 | 2.914813 |
| H | 0.221562  | -1.686352 | 3.565041 |
| H | -0.319725 | -0.106839 | 3.009362 |
| H | 1.392357  | -0.393578 | 3.312962 |
| C | 3.287534  | -1.291724 | 1.540415 |
| H | 3.569696  | -2.165027 | 2.140732 |
| H | 3.280865  | -0.431110 | 2.215167 |
| H | 4.083487  | -1.138112 | 0.807051 |
| C | -2.864736 | -0.923319 | 2.286199 |
| H | -2.453186 | -0.159205 | 2.947984 |



|    |           |           |           |
|----|-----------|-----------|-----------|
| H  | -2.741513 | -1.895369 | 2.778369  |
| H  | -3.940389 | -0.740919 | 2.197870  |
| C  | -3.058224 | 2.169707  | 0.850407  |
| H  | -3.821549 | 1.413168  | 1.050281  |
| H  | -3.577292 | 3.112541  | 0.651775  |
| H  | -2.454635 | 2.298711  | 1.753875  |
| C  | 0.335328  | -2.214466 | -0.604527 |
| C  | 1.745755  | -2.056594 | -0.407869 |
| C  | -0.276601 | -2.905783 | -1.793378 |
| H  | -0.499213 | -3.947668 | -1.534745 |
| H  | -1.209623 | -2.448078 | -2.121471 |
| H  | 0.404323  | -2.930254 | -2.647195 |
| C  | 2.823329  | -2.480890 | -1.363850 |
| H  | 3.751697  | -1.925334 | -1.210040 |
| H  | 3.057254  | -3.543495 | -1.223781 |
| H  | 2.528561  | -2.360124 | -2.409836 |
| C  | -3.317246 | -1.834459 | -0.566139 |
| H  | -3.112826 | -1.706263 | -1.630994 |
| H  | -3.349338 | -2.909207 | -0.352423 |
| H  | -4.320456 | -1.440276 | -0.371715 |
| C  | -3.070302 | 1.560255  | -1.593735 |
| H  | -3.804184 | 0.770413  | -1.418342 |
| H  | -3.618700 | 2.475995  | -1.836003 |
| H  | -2.474686 | 1.283194  | -2.469025 |
| Si | -2.072322 | -0.996379 | 0.575105  |
| N  | -1.397108 | 0.549317  | -0.061573 |
| C  | -0.346703 | -1.773640 | 0.583218  |
| C  | -2.178439 | 1.790786  | -0.356622 |
| C  | -1.216865 | 2.956931  | -0.638600 |
| H  | -0.593714 | 3.170674  | 0.235701  |
| H  | -0.571862 | 2.749604  | -1.499222 |
| H  | -1.776111 | 3.867368  | -0.872362 |
| Ti | 0.450461  | 0.143660  | -0.277615 |
| C  | 1.981386  | 1.592160  | 0.070062  |
| C  | 1.705345  | 1.171032  | -2.191020 |
| C  | 0.715499  | 0.259841  | -2.537678 |
| H  | 1.521223  | 2.235190  | -2.270975 |
| H  | 2.749564  | 0.875451  | -2.195205 |
| H  | 0.990637  | -0.732490 | -2.870665 |
| H  | -0.250812 | 0.625751  | -2.872452 |
| H  | 2.854319  | 0.984828  | 0.321453  |
| H  | 1.252234  | 1.494373  | 0.941361  |
| C  | 2.386217  | 3.055149  | -0.050174 |
| H  | 3.163421  | 3.133027  | -0.819695 |
| H  | 1.542673  | 3.664740  | -0.390251 |
| C  | 2.935489  | 3.629974  | 1.266642  |
| H  | 3.808911  | 3.068675  | 1.613567  |
| H  | 3.239492  | 4.671443  | 1.127913  |
| H  | 2.180539  | 3.606701  | 2.059991  |

61

### 3F-fsi

|   |           |           |          |
|---|-----------|-----------|----------|
| C | 0.578478  | -1.421813 | 1.450474 |
| C | 1.739121  | -1.733075 | 0.678315 |
| C | 0.607518  | -0.898457 | 2.866116 |
| H | -0.121123 | -1.427283 | 3.484565 |
| H | 0.374339  | 0.170733  | 2.941262 |
| H | 1.591144  | -1.047847 | 3.315731 |
| C | 3.167773  | -1.686010 | 1.146175 |
| H | 3.470671  | -2.666812 | 1.532688 |

|    |           |           |           |
|----|-----------|-----------|-----------|
| H  | 3.321034  | -0.961892 | 1.949703  |
| H  | 3.857481  | -1.438999 | 0.334366  |
| C  | -2.667552 | -0.300416 | 2.593650  |
| H  | -1.981458 | 0.378533  | 3.104428  |
| H  | -2.712998 | -1.232889 | 3.168509  |
| H  | -3.665348 | 0.147539  | 2.627968  |
| C  | -3.213210 | 2.342244  | 0.438625  |
| H  | -3.985552 | 1.576751  | 0.558961  |
| H  | -3.712857 | 3.250417  | 0.087959  |
| H  | -2.775423 | 2.553778  | 1.418457  |
| C  | -0.114937 | -2.180494 | -0.621406 |
| C  | 1.308607  | -2.217961 | -0.594252 |
| C  | -0.962849 | -2.657843 | -1.770208 |
| H  | -1.538731 | -3.539885 | -1.470024 |
| H  | -1.673516 | -1.902752 | -2.112436 |
| H  | -0.348816 | -2.940432 | -2.626653 |
| C  | 2.212180  | -2.766066 | -1.658236 |
| H  | 3.181946  | -2.261333 | -1.674141 |
| H  | 2.408771  | -3.829284 | -1.472886 |
| H  | 1.775349  | -2.687918 | -2.655730 |
| C  | -3.681435 | -1.455877 | -0.022617 |
| H  | -3.578627 | -1.612545 | -1.097288 |
| H  | -3.870629 | -2.431394 | 0.441813  |
| H  | -4.574230 | -0.844190 | 0.144672  |
| C  | -2.798135 | 1.585870  | -1.929087 |
| H  | -3.528670 | 0.779474  | -1.827284 |
| H  | -3.321946 | 2.465161  | -2.317539 |
| H  | -2.052852 | 1.279847  | -2.669371 |
| Si | -2.184858 | -0.673041 | 0.810724  |
| N  | -1.417045 | 0.693010  | -0.069768 |
| C  | -0.588328 | -1.683244 | 0.653453  |
| C  | -2.135339 | 1.911481  | -0.575693 |
| C  | -1.156372 | 3.086373  | -0.753395 |
| H  | -0.668769 | 3.337805  | 0.195216  |
| H  | -0.392371 | 2.875529  | -1.508820 |
| H  | -1.693704 | 3.977071  | -1.091766 |
| Ti | 0.368715  | 0.082075  | -0.323487 |
| C  | 2.226605  | 1.667878  | -0.225561 |
| C  | 2.322373  | 1.014356  | -1.647979 |
| C  | 1.027423  | 0.375396  | -2.230944 |
| H  | 2.635925  | 1.832140  | -2.306998 |
| H  | 3.133646  | 0.281712  | -1.631864 |
| H  | 1.242650  | -0.399604 | -2.963027 |
| H  | 0.382050  | 1.135824  | -2.686336 |
| H  | 2.064035  | 0.932373  | 0.604755  |
| H  | 1.413368  | 2.407569  | -0.189931 |
| C  | 3.533959  | 2.377525  | 0.181891  |
| H  | 4.355112  | 1.652929  | 0.134069  |
| H  | 3.746693  | 3.141008  | -0.575179 |
| C  | 3.470571  | 3.016976  | 1.570450  |
| H  | 3.290832  | 2.269695  | 2.351808  |
| H  | 4.414104  | 3.516311  | 1.805589  |
| H  | 2.675351  | 3.767637  | 1.631064  |

61

### 3E-bsi

|   |          |           |           |
|---|----------|-----------|-----------|
| C | 1.462208 | -1.771080 | 0.106421  |
| C | 2.604027 | -0.913817 | -0.000685 |
| C | 1.416122 | -2.970893 | 1.014243  |
| H | 2.031192 | -3.766174 | 0.575479  |

|    |           |           |           |
|----|-----------|-----------|-----------|
| H  | 0.412360  | -3.376439 | 1.128626  |
| H  | 1.827735  | -2.771305 | 2.007888  |
| C  | 3.875272  | -1.003659 | 0.793259  |
| H  | 4.660963  | -1.480801 | 0.194002  |
| H  | 3.761353  | -1.604006 | 1.698638  |
| H  | 4.249924  | -0.016376 | 1.080379  |
| C  | -1.976574 | -3.033205 | 0.244678  |
| H  | -1.746304 | -2.979526 | 1.311711  |
| H  | -1.552290 | -3.962485 | -0.151853 |
| H  | -3.064170 | -3.114276 | 0.152307  |
| C  | -3.826200 | -0.159913 | 0.883382  |
| H  | -4.116201 | -0.858174 | 0.092650  |
| H  | -4.715894 | 0.421763  | 1.143252  |
| H  | -3.531107 | -0.736925 | 1.764736  |
| C  | 1.112468  | -0.328568 | -1.659610 |
| C  | 2.400553  | -0.040355 | -1.094443 |
| C  | 0.578791  | 0.301593  | -2.922111 |
| H  | 0.709004  | -0.387209 | -3.764294 |
| H  | -0.482474 | 0.545537  | -2.860089 |
| H  | 1.111515  | 1.221873  | -3.168894 |
| C  | 3.440937  | 0.909037  | -1.613075 |
| H  | 4.289554  | 0.345430  | -2.019325 |
| H  | 3.067081  | 1.546096  | -2.415987 |
| H  | 3.838478  | 1.553316  | -0.821596 |
| C  | -2.282891 | -1.623625 | -2.399906 |
| H  | -2.104622 | -0.787335 | -3.076591 |
| H  | -1.970873 | -2.540020 | -2.916281 |
| H  | -3.362685 | -1.702060 | -2.235446 |
| C  | -3.123529 | 1.519319  | -0.859828 |
| H  | -3.330167 | 0.819427  | -1.672354 |
| H  | -4.034751 | 2.097610  | -0.677543 |
| H  | -2.346424 | 2.214220  | -1.193170 |
| Si | -1.367512 | -1.552557 | -0.754461 |
| N  | -1.444299 | 0.009621  | 0.157198  |
| C  | 0.519599  | -1.424803 | -0.923818 |
| C  | -2.695976 | 0.783597  | 0.428636  |
| C  | -2.451664 | 1.825697  | 1.535600  |
| H  | -2.264517 | 1.353799  | 2.503819  |
| H  | -1.607404 | 2.478246  | 1.295304  |
| H  | -3.330113 | 2.466839  | 1.653099  |
| Ti | 0.409548  | 0.365965  | 0.425049  |
| C  | 0.152965  | 4.163209  | -0.297282 |
| H  | -0.674250 | 4.199926  | 0.416639  |
| H  | 0.902792  | 4.890391  | 0.026278  |
| H  | -0.226363 | 4.475065  | -1.275094 |
| C  | 0.793300  | 2.765299  | -0.367473 |
| C  | 1.278330  | 2.193871  | 0.958457  |
| H  | 0.741182  | 2.629248  | 1.808870  |
| H  | 2.353471  | 2.272490  | 1.120343  |
| H  | 0.010928  | 2.095241  | -0.834121 |
| H  | 1.600533  | 2.765248  | -1.101209 |
| C  | 1.184315  | 0.078917  | 3.008068  |
| C  | -0.002264 | -0.550848 | 2.884655  |
| H  | -0.927050 | -0.071503 | 3.182807  |
| H  | -0.070081 | -1.594701 | 2.602636  |
| H  | 1.252866  | 1.082269  | 3.411289  |
| H  | 2.123273  | -0.426131 | 2.809087  |

61

3 TS(E-F)-bsi

|    |           |           |           |
|----|-----------|-----------|-----------|
| C  | -1.281641 | -1.842319 | -0.476271 |
| C  | -2.493116 | -1.115926 | -0.257811 |
| C  | -1.070362 | -2.807091 | -1.611527 |
| H  | -1.194838 | -3.832322 | -1.244206 |
| H  | -0.076991 | -2.740161 | -2.054864 |
| H  | -1.804074 | -2.662351 | -2.407180 |
| C  | -3.702432 | -1.115123 | -1.147781 |
| H  | -4.338011 | -1.982130 | -0.928594 |
| H  | -3.442403 | -1.174190 | -2.208159 |
| H  | -4.316734 | -0.222991 | -1.001203 |
| C  | 2.177527  | -2.928232 | -0.629790 |
| H  | 2.033300  | -2.703788 | -1.689170 |
| H  | 1.713104  | -3.898877 | -0.422714 |
| H  | 3.252786  | -3.042261 | -0.461157 |
| C  | 3.773095  | 0.056110  | -1.041948 |
| H  | 4.138675  | -0.703237 | -0.344366 |
| H  | 4.621515  | 0.700427  | -1.292392 |
| C  | 3.445839  | -0.442994 | -1.958412 |
| C  | -1.120290 | -0.765544 | 1.563546  |
| C  | -2.402133 | -0.466923 | 1.001513  |
| C  | -0.676341 | -0.356977 | 2.945096  |
| H  | -0.761374 | -1.207819 | 3.630268  |
| H  | 0.360807  | -0.020020 | 2.975547  |
| H  | -1.296300 | 0.445436  | 3.350196  |
| C  | -3.524458 | 0.284539  | 1.659564  |
| H  | -4.273303 | -0.420624 | 2.040002  |
| H  | -3.189521 | 0.880294  | 2.510701  |
| H  | -4.047015 | 0.949898  | 0.964656  |
| C  | 2.381340  | -1.822011 | 2.174168  |
| H  | 2.188296  | -1.045392 | 2.915697  |
| H  | 2.092422  | -2.784065 | 2.614914  |
| H  | 3.462821  | -1.861682 | 2.004581  |
| C  | 3.127138  | 1.528252  | 0.894448  |
| H  | 3.406725  | 0.761220  | 1.620601  |
| H  | 4.006170  | 2.155427  | 0.714185  |
| H  | 2.351917  | 2.156746  | 1.343606  |
| Si | 1.477909  | -1.616147 | 0.532221  |
| N  | 1.441059  | 0.046205  | -0.149542 |
| C  | -0.410692 | -1.629369 | 0.651967  |
| C  | 2.639046  | 0.898486  | -0.426961 |
| C  | 2.276233  | 2.017980  | -1.419900 |
| H  | 2.026822  | 1.613382  | -2.404995 |
| H  | 1.432793  | 2.616950  | -1.059437 |
| H  | 3.119719  | 2.702200  | -1.550175 |
| Ti | -0.427504 | 0.375000  | -0.357398 |
| C  | -0.143659 | 3.868829  | 1.063839  |
| H  | 0.602818  | 4.049370  | 0.286351  |
| H  | -0.872495 | 4.683257  | 1.025396  |
| H  | 0.359709  | 3.911604  | 2.033588  |
| C  | -0.862702 | 2.524455  | 0.875610  |
| C  | -1.545310 | 2.376140  | -0.492368 |
| H  | -1.527635 | 3.329420  | -1.011131 |
| H  | -2.578309 | 2.040142  | -0.408406 |
| H  | -0.098327 | 1.732794  | 1.121800  |
| H  | -1.603292 | 2.379125  | 1.665539  |
| C  | -1.058869 | 1.627995  | -2.425329 |
| C  | -0.613749 | 0.290582  | -2.544266 |
| H  | 0.402967  | 0.112532  | -2.879625 |
| H  | -1.336126 | -0.452452 | -2.858592 |
| H  | -0.358207 | 2.428340  | -2.634869 |

H -2.089065 1.858305 -2.674318

61

**3F-bsi**

C -0.313909 -2.201118 -0.617509  
C -1.733849 -2.024357 -0.506602  
C 0.347390 -2.805350 -1.828830  
H 0.199735 -3.892303 -1.819041  
H 1.419869 -2.624308 -1.854803  
H -0.083777 -2.434520 -2.763893  
C -2.760139 -2.451495 -1.512608  
H -3.112308 -3.465102 -1.284273  
H -2.356179 -2.472392 -2.527286  
H -3.634450 -1.795704 -1.510212  
C 3.357332 -2.089886 -0.198290  
H 3.348935 -2.041359 -1.288912  
H 3.215979 -3.136309 0.096318  
H 4.356108 -1.791510 0.135868  
C 3.584639 1.039808 -1.442248  
H 4.230614 0.489168 -0.753362  
H 4.164275 1.884240 -1.827026  
H 3.338888 0.387490 -2.285385  
C -0.752637 -1.331795 1.468782  
C -2.001153 -1.484298 0.777791  
C -0.626958 -0.812681 2.882089  
H 0.132392 -1.373003 3.430245  
H -0.352599 0.247551 2.939463  
H -1.571841 -0.928205 3.417608  
C -3.366800 -1.228130 1.346073  
H -3.740950 -2.136082 1.836022  
H -3.368366 -0.435742 2.098376  
H -4.089098 -0.962063 0.570764  
C 2.684193 -0.632479 2.377915  
H 2.096044 0.117127 2.910628  
H 2.703282 -1.546557 2.983311  
H 3.715910 -0.269621 2.320369  
C 2.694540 2.420415 0.471483  
H 3.283235 1.855088 1.197820  
H 3.295531 3.276502 0.149190  
H 1.802416 2.803032 0.977505  
Si 2.048789 -1.028605 0.650619  
N 1.462314 0.413168 -0.274937  
C 0.310487 -1.799346 0.624167  
C 2.310299 1.555990 -0.747955  
C 1.530368 2.424640 -1.748674  
H 1.257927 1.856167 -2.643789  
H 0.620997 2.842842 -1.302463  
H 2.145097 3.269836 -2.070866  
Ti -0.400108 0.057094 -0.399547  
C -1.515872 3.418183 1.836641  
H -0.971452 4.257684 1.393970  
H -2.473415 3.797436 2.206060  
H -0.944790 3.055909 2.696460  
C -1.755534 2.311163 0.802942  
C -2.520366 2.758328 -0.450334  
H -1.923524 3.505184 -0.990077  
H -3.434755 3.271556 -0.130016  
H -0.730015 1.963385 0.512854  
H -2.283179 1.474259 1.278500  
C -2.883355 1.598838 -1.388587

C -1.660963 0.796433 -1.874646  
H -3.428903 2.000790 -2.252572  
H -3.587382 0.929454 -0.876917  
H -1.963209 0.026186 -2.594047  
H -0.960176 1.468945 -2.400053

55

**3TSe**

C -0.967838 -1.636697 -0.940548  
C -2.290955 -1.099190 -0.811882  
C -0.401313 -2.189144 -2.227147  
H -0.204039 -3.260840 -2.123505  
H 0.538546 -1.715700 -2.524627  
H -1.106422 -2.066422 -3.051421  
C -3.315534 -0.998983 -1.908355  
H -3.823298 -1.962137 -2.039611  
H -2.874128 -0.737782 -2.874341  
H -4.088194 -0.260460 -1.680348  
C 2.486613 -2.689281 -0.533558  
H 2.402091 -2.541077 -1.611344  
H 2.111195 -3.693685 -0.303004  
H 3.550197 -2.675410 -0.276490  
C 3.709831 0.464747 -1.096093  
H 4.148818 -0.286020 -0.432813  
H 4.497736 1.183861 -1.340337  
H 3.402674 -0.028656 -2.022912  
C -1.298718 -1.059543 1.275760  
C -2.492124 -0.745478 0.546302  
C -1.189225 -0.977702 2.773213  
H -1.622734 -1.882735 3.216234  
H -0.156962 -0.912421 3.111139  
H -1.730725 -0.120103 3.178294  
C -3.763832 -0.216027 1.142524  
H -4.410612 -1.046765 1.451092  
H -3.577783 0.388232 2.033917  
H -4.338372 0.385306 0.432317  
C 2.245351 -1.501654 2.252233  
H 1.935344 -0.666769 2.884572  
H 1.956338 -2.436193 2.746453  
H 3.339881 -1.491902 2.203805  
C 2.988007 1.833409 0.894827  
H 3.379880 1.082452 1.585461  
H 3.783684 2.560980 0.704928  
H 2.157597 2.347931 1.387323  
Si 1.540330 -1.435590 0.507870  
N 1.414743 0.231648 -0.154254  
C -0.342841 -1.635900 0.363045  
C 2.526789 1.189616 -0.427758  
C 2.018487 2.285696 -1.382416  
H 1.653838 1.855419 -2.323429  
H 1.218463 2.874616 -0.920316  
H 2.819285 2.987495 -1.632952  
Ti -0.456451 0.481027 -0.300177  
C -1.029576 3.868805 0.821849  
H -0.115306 4.122751 0.281781  
H -1.703048 4.733887 0.756451  
H -0.797901 3.712039 1.877022  
C -1.751461 2.697328 0.224244  
C -1.641249 2.286248 -1.089433  
H -0.956375 2.797217 -1.765361

|   |           |          |           |
|---|-----------|----------|-----------|
| H | -2.451867 | 1.720982 | -1.546422 |
| H | -0.709471 | 1.339522 | 1.130153  |
| H | -2.596707 | 2.329029 | 0.800929  |

55

### 3H-E

|    |           |           |           |
|----|-----------|-----------|-----------|
| C  | -0.768413 | -1.620478 | -1.069540 |
| C  | -2.128601 | -1.301431 | -0.751475 |
| C  | -0.261342 | -1.896282 | -2.463628 |
| H  | 0.018347  | -2.950592 | -2.561848 |
| H  | 0.619708  | -1.304512 | -2.723813 |
| H  | -1.027703 | -1.692907 | -3.214015 |
| C  | -3.274651 | -1.220147 | -1.722524 |
| H  | -3.735497 | -2.208282 | -1.840803 |
| H  | -2.961304 | -0.896916 | -2.718599 |
| H  | -4.061132 | -0.542729 | -1.379177 |
| C  | 2.843334  | -2.143306 | -1.126766 |
| H  | 2.664373  | -1.771505 | -2.137257 |
| H  | 2.624338  | -3.217931 | -1.119767 |
| H  | 3.911947  | -2.032158 | -0.915500 |
| C  | 3.417684  | 1.366195  | -1.222464 |
| H  | 4.057711  | 0.521334  | -0.952960 |
| H  | 4.057759  | 2.249607  | -1.310017 |
| H  | 2.978869  | 1.165014  | -2.204887 |
| C  | -0.944783 | -1.419279 | 1.229814  |
| C  | -2.232304 | -1.172864 | 0.658834  |
| C  | -0.699424 | -1.527764 | 2.708118  |
| H  | -0.895037 | -2.557484 | 3.032187  |
| H  | 0.326335  | -1.288483 | 2.980792  |
| H  | -1.359010 | -0.868634 | 3.275772  |
| C  | -3.486381 | -0.909396 | 1.440075  |
| H  | -3.884825 | -1.849058 | 1.842355  |
| H  | -3.304268 | -0.248637 | 2.292091  |
| H  | -4.274415 | -0.469577 | 0.823780  |
| C  | 2.686035  | -1.618068 | 1.856220  |
| H  | 2.369718  | -0.956006 | 2.664685  |
| H  | 2.508576  | -2.653210 | 2.170123  |
| H  | 3.768522  | -1.501375 | 1.735824  |
| C  | 2.967135  | 1.854914  | 1.214834  |
| H  | 3.596348  | 1.015270  | 1.519727  |
| H  | 3.600842  | 2.746823  | 1.177979  |
| H  | 2.199655  | 2.006088  | 1.979285  |
| Si | 1.828020  | -1.289838 | 0.212402  |
| N  | 1.416814  | 0.426846  | -0.096956 |
| C  | -0.020925 | -1.715273 | 0.161700  |
| C  | 2.324989  | 1.606975  | -0.163846 |
| C  | 1.501161  | 2.844021  | -0.563528 |
| H  | 1.076221  | 2.727895  | -1.568315 |
| H  | 0.698211  | 3.032511  | 0.161934  |
| H  | 2.126364  | 3.741428  | -0.582726 |
| Ti | -0.474469 | 0.446832  | -0.133096 |
| C  | -2.243396 | 3.671144  | 0.800095  |
| H  | -1.443047 | 4.280524  | 0.375279  |
| H  | -3.158434 | 4.276741  | 0.832644  |
| H  | -1.999906 | 3.414671  | 1.835991  |
| C  | -2.514960 | 2.442616  | -0.001194 |
| C  | -1.933467 | 2.120841  | -1.183404 |
| H  | -1.232810 | 2.802039  | -1.661174 |
| H  | -2.337888 | 1.311513  | -1.791992 |
| H  | -0.705894 | 1.004450  | 1.414695  |

|   |           |          |          |
|---|-----------|----------|----------|
| H | -3.284478 | 1.779075 | 0.392941 |
|---|-----------|----------|----------|

61

### 3G

|    |           |           |           |
|----|-----------|-----------|-----------|
| C  | -0.930227 | -1.366387 | -1.371795 |
| C  | -2.238330 | -1.101662 | -0.879140 |
| C  | -0.544245 | -1.349896 | -2.826066 |
| H  | -0.333116 | -2.369962 | -3.165200 |
| H  | 0.344356  | -0.747500 | -3.022124 |
| H  | -1.351818 | -0.960358 | -3.448620 |
| C  | -3.440696 | -0.764547 | -1.710990 |
| H  | -3.851228 | -1.678162 | -2.158524 |
| H  | -3.202424 | -0.086806 | -2.535405 |
| H  | -4.238939 | -0.313116 | -1.117698 |
| C  | 2.693051  | -1.918649 | -1.767840 |
| H  | 2.361824  | -1.417282 | -2.678202 |
| H  | 2.578441  | -2.999110 | -1.918866 |
| H  | 3.764386  | -1.725463 | -1.647299 |
| C  | 2.869851  | 1.677578  | -1.504057 |
| H  | 3.301928  | 0.789647  | -1.970884 |
| H  | 3.615484  | 2.477521  | -1.554736 |
| H  | 2.002517  | 1.984216  | -2.094656 |
| C  | -0.943394 | -1.791736 | 0.902706  |
| C  | -2.241270 | -1.333851 | 0.530420  |
| C  | -0.605114 | -2.390453 | 2.242040  |
| H  | 0.391460  | -2.129880 | 2.598075  |
| H  | -1.331376 | -2.115825 | 3.010577  |
| H  | -0.635750 | -3.483297 | 2.156758  |
| C  | -3.447588 | -1.250551 | 1.424641  |
| H  | -4.002042 | -2.196924 | 1.410087  |
| H  | -3.178662 | -1.054197 | 2.465610  |
| H  | -4.141064 | -0.468040 | 1.105493  |
| C  | 2.657477  | -2.256891 | 1.236405  |
| H  | 2.469418  | -1.788232 | 2.205579  |
| H  | 2.366468  | -3.311009 | 1.307138  |
| H  | 3.738505  | -2.231924 | 1.066804  |
| C  | 3.735806  | 0.972594  | 0.750747  |
| H  | 4.217150  | 0.100941  | 0.297619  |
| H  | 4.472198  | 1.782142  | 0.756555  |
| H  | 3.493015  | 0.730437  | 1.789905  |
| Si | 1.761500  | -1.429372 | -0.205208 |
| N  | 1.444531  | 0.324330  | 0.012071  |
| C  | -0.098022 | -1.777210 | -0.263095 |
| C  | 2.482294  | 1.405263  | -0.035531 |
| C  | 1.949223  | 2.707453  | 0.595048  |
| H  | 1.037682  | 3.061470  | 0.103109  |
| H  | 1.753503  | 2.587717  | 1.664852  |
| H  | 2.691095  | 3.504805  | 0.493114  |
| Ti | -0.460124 | 0.402714  | 0.120114  |
| C  | -2.145096 | 3.718482  | -0.441974 |
| H  | -1.222228 | 4.062040  | 0.036944  |
| H  | -2.231830 | 4.245903  | -1.395945 |
| H  | -2.988273 | 4.016888  | 0.188407  |
| C  | -2.129992 | 2.203308  | -0.689535 |
| C  | -0.942459 | 1.667290  | -1.471772 |
| H  | -0.129347 | 2.393395  | -1.559925 |
| H  | -1.185625 | 1.277180  | -2.456701 |
| H  | -2.194492 | 1.718057  | 0.332928  |
| H  | -3.067363 | 1.877286  | -1.146374 |
| C  | -0.199509 | 0.837250  | 2.868426  |

|   |           |           |          |
|---|-----------|-----------|----------|
| C | -1.056304 | 1.784405  | 2.446707 |
| H | 0.875172  | 0.971175  | 2.821025 |
| H | -0.707416 | 2.739113  | 2.061418 |
| H | -2.127841 | 1.675748  | 2.589613 |
| H | -0.556471 | -0.068156 | 3.343374 |

61

### 3TS<sub>T</sub>

|    |           |           |           |
|----|-----------|-----------|-----------|
| C  | 1.141337  | -1.332843 | 1.292338  |
| C  | 2.380920  | -0.989016 | 0.675799  |
| C  | 0.929827  | -1.439230 | 2.778851  |
| H  | 0.965551  | -2.494797 | 3.072192  |
| H  | -0.032940 | -1.046891 | 3.107672  |
| H  | 1.715495  | -0.929853 | 3.342189  |
| C  | 3.637152  | -0.578471 | 1.391142  |
| H  | 4.187353  | -1.463295 | 1.734355  |
| H  | 3.433721  | 0.028995  | 2.277880  |
| H  | 4.314176  | -0.014533 | 0.744097  |
| C  | -2.380328 | -1.858106 | 2.070594  |
| H  | -2.162694 | -1.092882 | 2.819041  |
| H  | -1.999861 | -2.816094 | 2.443071  |
| H  | -3.468922 | -1.950691 | 2.001076  |
| C  | -3.520067 | 1.206425  | 0.998927  |
| H  | -4.020606 | 0.241375  | 1.113149  |
| H  | -4.298637 | 1.967353  | 0.884957  |
| H  | -2.969730 | 1.418346  | 1.920605  |
| C  | 0.945703  | -1.719093 | -0.977802 |
| C  | 2.261240  | -1.227716 | -0.722850 |
| C  | 0.480600  | -2.285003 | -2.294110 |
| H  | -0.484854 | -1.891760 | -2.616836 |
| H  | 1.203325  | -2.099139 | -3.092025 |
| H  | 0.376259  | -3.371985 | -2.206675 |
| C  | 3.371550  | -1.103704 | -1.728029 |
| H  | 3.882591  | -2.066241 | -1.852626 |
| H  | 3.011814  | -0.807588 | -2.717526 |
| H  | 4.128415  | -0.379543 | -1.415864 |
| C  | -2.633922 | -2.525609 | -0.871273 |
| H  | -2.483958 | -2.248388 | -1.916092 |
| H  | -2.357094 | -3.580863 | -0.759097 |
| H  | -3.705234 | -2.452275 | -0.656164 |
| C  | -3.384028 | 0.851132  | -1.490489 |
| H  | -3.856027 | -0.128927 | -1.394250 |
| H  | -4.177046 | 1.586140  | -1.660979 |
| H  | -2.745054 | 0.833019  | -2.378607 |
| Si | -1.650360 | -1.498389 | 0.367356  |
| N  | -1.465814 | 0.245555  | -0.029829 |
| C  | 0.221529  | -1.756586 | 0.268062  |
| C  | -2.582495 | 1.220982  | -0.224831 |
| C  | -2.031470 | 2.651318  | -0.389325 |
| H  | -1.534183 | 2.994551  | 0.521599  |
| H  | -1.334132 | 2.731482  | -1.230153 |
| H  | -2.848285 | 3.350236  | -0.591254 |
| Ti | 0.427454  | 0.439411  | -0.143706 |
| C  | 1.506177  | 3.852899  | 0.671810  |
| H  | 0.469974  | 4.121487  | 0.452819  |
| H  | 1.812335  | 4.417334  | 1.559214  |
| H  | 2.142063  | 4.177380  | -0.155975 |
| C  | 1.664358  | 2.374338  | 0.985586  |
| C  | 0.733899  | 1.676853  | 1.781028  |
| H  | -0.219975 | 2.143587  | 2.007196  |

|   |           |          |           |
|---|-----------|----------|-----------|
| H | 1.086005  | 0.967170 | 2.514009  |
| H | 1.539105  | 1.920168 | -0.429636 |
| H | 2.701465  | 2.046408 | 1.071649  |
| C | 0.496725  | 0.963261 | -2.412196 |
| C | 1.395260  | 1.919522 | -1.928627 |
| H | -0.524001 | 1.248686 | -2.636861 |
| H | 1.083455  | 2.961306 | -1.879994 |
| H | 2.462331  | 1.772988 | -2.086279 |
| H | 0.865734  | 0.091147 | -2.930163 |

61

### 3H-T

|    |           |           |           |
|----|-----------|-----------|-----------|
| C  | 1.076565  | -1.090862 | 1.405346  |
| C  | 2.243679  | -1.130988 | 0.585322  |
| C  | 1.047594  | -0.682585 | 2.856848  |
| H  | 0.667744  | -1.505954 | 3.469191  |
| H  | 0.405600  | 0.180088  | 3.056422  |
| H  | 2.048442  | -0.445674 | 3.223417  |
| C  | 3.657756  | -0.832185 | 0.999932  |
| H  | 4.182655  | -1.765940 | 1.236102  |
| H  | 3.711722  | -0.201978 | 1.889257  |
| H  | 4.227167  | -0.343076 | 0.204253  |
| C  | -2.302255 | -0.763114 | 2.683232  |
| H  | -1.830773 | 0.115106  | 3.130550  |
| H  | -2.032840 | -1.636131 | 3.288668  |
| H  | -3.385575 | -0.633828 | 2.768598  |
| C  | -3.688936 | 1.525539  | 0.495828  |
| H  | -4.204448 | 0.581707  | 0.696973  |
| H  | -4.444319 | 2.235125  | 0.144321  |
| H  | -3.280908 | 1.906783  | 1.436665  |
| C  | 0.488294  | -1.989094 | -0.646153 |
| C  | 1.877114  | -1.691572 | -0.676940 |
| C  | -0.258302 | -2.695240 | -1.745416 |
| H  | -1.164540 | -2.167403 | -2.047616 |
| H  | 0.364304  | -2.817135 | -2.633617 |
| H  | -0.552992 | -3.696292 | -1.411934 |
| C  | 2.827991  | -2.017975 | -1.790794 |
| H  | 3.123777  | -3.073038 | -1.738278 |
| H  | 2.382012  | -1.861140 | -2.776722 |
| H  | 3.743610  | -1.424798 | -1.735294 |
| C  | -3.092749 | -2.256597 | 0.171508  |
| H  | -2.993927 | -2.453427 | -0.896749 |
| H  | -2.989352 | -3.213125 | 0.698681  |
| H  | -4.110960 | -1.898767 | 0.356468  |
| C  | -3.197701 | 0.764505  | -1.852609 |
| H  | -3.650493 | -0.210866 | -1.659581 |
| H  | -3.980688 | 1.424665  | -2.239484 |
| H  | -2.442385 | 0.640998  | -2.633232 |
| Si | -1.827144 | -1.053830 | 0.880447  |
| N  | -1.511115 | 0.441481  | -0.061398 |
| C  | -0.033230 | -1.605472 | 0.648045  |
| C  | -2.585332 | 1.361742  | -0.568592 |
| C  | -2.022435 | 2.762418  | -0.877303 |
| H  | -1.688045 | 3.265915  | 0.033786  |
| H  | -1.193396 | 2.729652  | -1.591843 |
| H  | -2.801997 | 3.385794  | -1.324869 |
| Ti | 0.374828  | 0.344318  | -0.355117 |
| C  | 3.351802  | 2.916229  | 0.684017  |
| H  | 3.120924  | 3.462983  | -0.232906 |
| H  | 3.819913  | 3.614262  | 1.390137  |

|   |           |           |           |
|---|-----------|-----------|-----------|
| H | 4.104596  | 2.149065  | 0.472914  |
| C | 2.134908  | 2.333750  | 1.325615  |
| C | 0.860856  | 2.535010  | 0.923602  |
| H | 0.643800  | 3.197584  | 0.087978  |
| H | 0.022844  | 2.237021  | 1.547397  |
| H | 2.260180  | 1.234172  | -1.193431 |
| H | 2.301829  | 1.754059  | 2.231555  |
| C | 0.533174  | 0.528657  | -2.411846 |
| C | 1.868132  | 1.256395  | -2.242915 |
| H | -0.266068 | 1.186868  | -2.759213 |
| H | 1.816839  | 2.318180  | -2.497842 |
| H | 2.672146  | 0.788313  | -2.814736 |
| H | 0.583650  | -0.342875 | -3.060239 |
